1 **DNA methylation plays a role on *in vitro* culture induced loss of virulence in *Botrytis***  
2 ***cinerea***

3 Jimmy Breen<sup>1</sup>, Luis Alejandro Jose Mur<sup>2</sup>, Anushen Sivakumaran<sup>2</sup>, Aderemi Akinyemi<sup>2</sup>,  
4 Michael James Wilkinson<sup>2</sup>, Carlos Marcelino Rodriguez Lopez<sup>3\*</sup>

5 <sup>1</sup>Robinson Research Institute, University of Adelaide, North Terrace Campus, Adelaide SA  
6 5005

7 <sup>2</sup>Institute of Biological, Environmental and Rural Sciences, Edward Llywd Building, Penglais  
8 Campus, Aberystwyth, Ceredigion, SY23 3FG, UK.

9 <sup>3</sup>Environmental Epigenetics and Genetics Group, School of Agriculture, Food and Wine,  
10 Waite Research Precinct, University of Adelaide, PMB 1, Glen Osmond, SA 5064, Australia.

11

12

13 *\*Corresponding author*

14

## 15 Summary

- 16 • Little is known about the mechanisms causing loss of virulence in pathogenic fungi as a  
17 result of protracted culture. We studied the extent to which patterns of DNA methylation  
18 varied between virulent and reduced virulence derivative cultures of *Botrytis cinerea*,  
19 and identify the genes/genomic regions affected by these epigenetic modifications.
- 20 • *B. cinerea* was cultured *in vitro* for eight months involving subculture every four weeks.  
21 Fungal conidia were harvested at every four-week subculturing stage and inoculated onto  
22 *Arabidopsis thaliana* Col-0 plants for virulence testing. Global epi/genetic changes in *B.*  
23 *cinerea* during culture were assessed using methylation-sensitive amplified  
24 polymorphisms (MSAPs) on mycelium from eight different sub-culture time points and  
25 from mycelium recovered after eight months in culture and then inoculated onto *A.*  
26 *thaliana*. Culture induced epi/allele characterisation was carried out by whole genome  
27 sequencing and bisulfite sequencing of gDNA from samples after two and eight months  
28 in culture and after 8 months in culture and following inoculation onto an *A. thaliana*  
29 plant.
- 30 • Virulence declined with time in culture and recovered after one fungal generation on *A.*  
31 *thaliana*. MSAP data show that epi/genetic variation followed virulence changes during  
32 culture. Whole genome sequencing showed no significant genetic changes during  
33 culture. Conversely, bisulfite sequencing showed significant changes both on global and  
34 local methylation patterns.
- 35 • We suggest that virulence is a non-essential plastic character regulated by DNA  
36 methylation during protracted *in vitro* culture. We propose DNA methylation as a  
37 regulator of the high virulence/low virulence transition in *B. cinerea* and as a potential  
38 mechanism to control pathogenicity.

39

## 40 **Introduction**

41 *Botrytis cinerea* is an ascomycete responsible for grey mould on hundreds of dicot plants that  
42 is able to feed on different plant tissues (1) and causes annually up to \$100 billion in losses  
43 worldwide (2). The wide variety of symptoms on different organs and plant species may  
44 suggest that *B. cinerea* has a large ‘arsenal of weapons’ to attack its host plants. *B. cinerea* is  
45 well documented as a capable saprotroph and necrotroph with genetic types showing a trade-  
46 off between saprotrophic and necrotrophic capabilities (3). As other pathogens, *B. cinerea*  
47 undergoes transcriptional and developmental regulation to govern the outcome of  
48 pathogen/host interactions. Population dynamics between the two types have been linked to  
49 resource availability. Interestingly, changes in virulence levels have also been observed  
50 during protracted *in vitro* culture of *B. cinerea* (4). In fact, pathogenic fungi are notorious for  
51 losing virulence when successively subcultured *in vitro*. Degenerate cultures have been  
52 reported in a wide range of pathogenic fungi (5) but very little is known about why the  
53 cultures degenerate. Different factors have been described as possible effectors of the  
54 observed loss of virulence during culture including dsRNA mycoviruses (6,7), loss of  
55 conditional dispensable chromosomes (8,9) or culture induced selection of nonvirulent  
56 strains. However, one characteristic common to almost all *in vitro*-derived nonvirulent fungal  
57 strains is that their virulence is restored after one passage on their host (5). If attenuated  
58 strains recover virulence then loss of virulence cannot be explained by mycoviruses infection  
59 or chromosome loss. Furthermore, fungal strains in culture lose virulence irrespective of  
60 whether the parent culture was derived from a single spore or multi-spore colony (5),  
61 suggesting that there cannot be a culture induced selection of nonvirulent strains.

62

63 This observed reversible phenotype in response to changes in the environment could be  
64 associated to phenotypic plasticity (10). In 1942 C.H. Waddington (11) first proposed the

65 term epigenotype to describe the interface between genotype and phenotype. Since then, a  
66 large body of research has been carried out to better understand the role of epigenetic  
67 regulatory systems in shaping the phenotype of higher organisms surviving in fluctuating  
68 environments (12,13). Epigenetic processes operate in a number of ways to alter the  
69 phenotype without altering the genetic code (14). These include DNA methylation, histone  
70 modifications, and mRNA editing and degradation by noncoding RNAs. Such processes are  
71 intimately entwined and often work in a synergistic way to ultimately achieve changes in  
72 phenotype (15). DNA methylation, and more specifically cytosine methylation (i.e. the  
73 incorporation of a methyl group to carbon 5 of the cytosine pyrimidine ring to form 5-  
74 methylcytosine (5-mC)) is probably the most studied epigenetic mechanism. It is present  
75 across many eukaryotic phyla, including plants, mammals, birds, fish, and invertebrates and  
76 provides an important source of epigenetic control for gene expression (16). In plants and  
77 animals, DNA methylation is known to be involved in diverse processes including transposon  
78 silencing, X-chromosome inactivation, and imprinting (17). In fungi, several studies have  
79 showed changes in overall 5-mC content during development in *Phymatotrichu omnivorum*  
80 (18) and *Magnaporthe oryzae* (19). Global patterns in DNA methylation has been previously  
81 shown to dramatically change in lichen fungi species when exposed to the algal symbiont  
82 (20). Methylation sequencing in Ascomycetes has shown that this group of fungi present  
83 heavily methylated silent repeated loci and methylated active genes. Zemach et al, (21)  
84 reported a correlation between gene body methylation and *gene* expression levels in  
85 *Uncinocarpus reesii*. More recently, Jeon et al., (19) ascribed a developmental role for DNA  
86 methylation in *M. oryzae*. In this pivotal paper, it was demonstrated that gene DNA  
87 methylation density genes changes during development, and that transcript abundance is  
88 negatively affected by DNA methylation upstream and downstream of ORFs while gene body  
89 methylation has positive effects.

90

91 Recent years have seen a dramatic increase in the depth of understanding of how epigenetic  
92 control mechanisms operate during plant/pathogen interactions (2,22). Conversely, little is  
93 known of the function of DNA methylation in relation to involvement of such processes in  
94 regulating traits related to virulence in fungal plant pathogens. Furthermore, no research has  
95 been done on the dynamic nature of DNA methylation during protracted culture and its  
96 possible contribution to loss of virulence. In this paper, our main objective is to examine if  
97 the observed loss of pathogenicity of *in vitro* cultures of *B. cinerea* can be related to  
98 differences in DNA methylation in their genomes. We used Methylation Sensitive Amplified  
99 Polymorphisms (MSAP) (23) as a preliminary approach in order to assess if the differences in  
100 pathogenicity observed during *in vitro* culture of *B. cinerea* could be correlated to changes in  
101 DNA methylation. For the high-throughput identification of Differentially Methylated  
102 Regions (DMRs) associated to the loss of pathogenicity in *B. cinerea* during *in vitro* culture  
103 we performed whole genome sequencing of sodium bisulfite modified DNA obtained from  
104 different times in culture. This approach provided us with the first confirmation that *B.*  
105 *cinerea* loss of pathogenicity induced by *in vitro* culture correlates with DNA methylation  
106 and targeted functional regions putatively involved in the epigenetic regulation of virulence  
107 in *B. cinerea*. We anticipate that these results will provide new targets for the control of *B.*  
108 *cinerea* caused disease. It also provides novel insights into the control of components that  
109 dictate saprotrophic and parasitic capability and proposes DNA methylation as a mechanism  
110 to control these processes.

111

## 112 **Results**

### 113 **Pathogenicity analysis of *Botrytis cinerea***

114 All isolates obtained from all culture time points produced lesions on *A. thaliana* to various  
115 extents (Figure 1A). As *B. cinerea* was successively cultured disease scores decreased over  
116 the eight month period (T0-T8) (Figure 1B). This loss of virulence with time in culture was  
117 significant from T3 onwards (T-Test  $P < 0.05$ ) (Figure 1B). The disease scores for the T8P  
118 challenge did not differ significantly from those for those at T0 culture times suggesting  
119 recovered virulence following single passage through a plant (Figure 1B). Conversely, T8  
120 virulence scores were significantly different from those obtained from T0 to T5 and T8P (T-  
121 Test  $P < 0.05$ ) (Figure 1B). Fungal DNA content within the infected areas of the leaf was  
122 measured by quantitative PCR to confirm that *in planta* fungal development increased  
123 between T8 and T8P generation as described previously (24). Infected leaves with T0 and  
124 T8P cultures did not show significant differences in fungal DNA content (Figure 1C).  
125 However both showed significantly higher levels of fungal DNA (T-Test  $P < 0.05$ ) when  
126 compared to those infected using T8 cultures (Figure 1C).

127

### 128 **Analysis of genetic and epigenetic variance during culture using MSAPs**

129 MSAP profiles generated a total of 74 loci (22 unique to *HpaII*, 4 unique to *MspI* and 48  
130 common to both enzymes) for the 112 samples of eight *B. cinerea* culture times used in this  
131 study (T2-T8P). Multivariate analysis of the MSAP profiles revealed that epigenetically, *B.*  
132 *cinerea* became progressively more dissimilar to the first time point analyzed (T2) with  
133 culture age (Figure 2). Both, PCoA (Figure 2A and C) and estimated PhiPT values (Figure  
134 2B) showed higher levels of time in culture induced variability when using *HpaII* than when  
135 using *MspI*. PCoA shows that samples cultivated for 3, 4, 5, 6, and 7 months occupied  
136 intermediate Eigenspace between samples cultivated for 2 and 8 months (Figure 2C).  
137 Furthermore, a partial recovery of the epigenetic profile was observed on samples cultured  
138 for 8 months after one fungal generation on the host plant (T8P) (Figure 2C). Calculated

139 PhiPT values between each time point and T2 samples show an increase in epigenetic  
140 distance with time in culture when samples were restricted with both enzymes. AMOVA  
141 analysis shows that the calculated PhiPT values were significantly different ( $P < 0.05$ ) between  
142 T2 and time points T6, T7, T8 and T8P when using *MspI* and T7, T8 and T8P when using  
143 *HpaII* (Figure 2B).

144

#### 145 ***B. cinerea* genome resequencing**

146 To determine if any of the *in vitro* culture variability detected using MSAP analysis could be  
147 attributed to genetic changes DNA extractions from 3 independent cultures from two time  
148 points (1 month (T1) and 8 months (T8) in culture) were pooled, sequenced and compared to  
149 the *B. cinerea* B05.10 genome sequence. Both samples were sequenced to an average depth  
150 of 37.47x (35.64x for the 1-month culture and 39.30x for the 8-month culture) with an  
151 average of 80% of reference bases being sequenced to a depth greater than 10x. After  
152 filtering for coverage greater than 10x and  $>30$  variant quality 186,275 variants from the *B.*  
153 *cinerea* B05.10 reference genome were identified between both samples, with 174,456  
154 variants being shared between both time points (i.e. T1 = T8). Additional filtering was used  
155 to remove multi-allelic variants, variants with missing data in one sample and variants with  
156 an observed allele frequency less than 0.5 (25). This filtering reduced the number of non-  
157 shared variants to 2,331, of which 1,030 (44%) were small insertions and deletions (INDELs)  
158 and 1,301 (56%) SNPs. CooVar (Vergara et al. 2012) was used to determine whether the  
159 detected variants altered specific annotations (genes, promoters etc). Of the 2,331 variants  
160 analysed, 454 were within genes including: 251 synonymous variants, 198 non-synonymous  
161 mutations (193 causing mis-sense variations and 5 causing premature stop codons (non-sense  
162 mutations) all located in the genes with unknown functions (BC1G\_07064, BC1G\_08869,

163 BC1G\_08189, BC1G\_12710 and BC1G\_01150). An additional 5 variants that altered  
164 predicted splice junctions were also identified.

165 We next focused the search for variants within the sequence of 1577 *B. cinerea* genes with  
166 known function including: secondary metabolism (i.e. sesquiterpenecyclases,  
167 diterpenecyclases, paxillin-like enzymes, fusiccocin-like enzymes, Phytoene synthases, non-  
168 ribosomal peptide synthetases, polyketides synthases, chalcone synthases, DiMethylAllyl  
169 Tryptophan Synthases) (26), conidiation (26), sclerotium formation (25), mating and fruit  
170 body development (26), apoptosis (26), housekeeping (26), signalling pathways (G protein-  
171 coupled receptors, MAP kinases, heterotrimeric G proteins, cAMP signalling components  
172 and  $\text{Ca}^{2+}$ -related signalling) (26) and virulence *sensu lato* genes (147 genes were  
173 duplicated, i.e., present in more than one category). The virulence *sensu lato* genes included:  
174 12 appressorium-associated genes (26), 17 virulence *sensu stricto* genes (27) and 1155 plant  
175 cell wall disassembly genes (CAZyme genes) (28). Of the 1577 tested genes, 68 (4.3%)  
176 contained one or more variants between T1 and T8 (See Table 1 and Supplementary Table 1  
177 for a comprehensive list of genes with variants).

178

### 179 ***B. cinerea* whole-genome bisulfite sequencing**

180 To validate and characterise the observed DNA methylation changes during culture of *B.*  
181 *cinerea* using MSAP analysis, we generated genome-wide DNA methylation maps across the  
182 fungal genome by conducting whole genome bisulphite sequencing (BS-seq) from triplicated  
183 genomic DNA extractions from mycelia of two different culture ages (1 month (T1) and 8  
184 months (T8)) and from samples culture for eight months and then inoculated onto an *A.*  
185 *thaliana* plant (T8P). BS-seq of these samples yielded 187.5 million reads ranging from 12.61  
186 to 34.05Gbp per sample after quality filtering. Mapping efficiency of each replicate ranged



187 from 54.3 to 67.6%, resulting in samples that generated between 33 and 55x coverage of the  
188 42.66Mbp genome (Supplementary Table 2). This is the highest genome coverage for  
189 bisulfite sequencing on any fungi to date. Each sample, covered over 91-93% of all cytosines  
190 present in the genome (Table 2), with all samples having at least 81% of cytosines covered by  
191 at least four sequencing reads, allowing methylation level of individual sites to be determined  
192 with reasonable confidence.

193

194 Bisulfite sequencing identified an average of 15716603 mC per sample, indicating an average  
195 methylation level of 0.6% with varying levels in each sample (Supplementary Table 2). The  
196 most common methylated context was CHH followed by CG and CHG (where H is A, C or  
197 T) (Supplementary Table 2). Although global levels of mC did not significantly change with  
198 culture time, methylation on contexts CG and CHG increased significantly (T-test,  $p=0.0008$   
199 and  $0.0018$ ) between 1 (T1) and 8 (T8) months in culture (Figure 3A). Both types of  
200 methylation showed a decreasing trend (not significant) on samples recovered from eight  
201 month old cultures inoculated onto *A. thaliana* (T8P) (Figure 3A). Conversely, methylation  
202 on all C and CHH showed a non-significant increasing trend with age culture (T1<T8<T8P).  
203 Analysis of local levels of DNA methylation across the largest *B. cinerea* contig (Supercontig  
204 1.1) showed that DNA methylation is not evenly distributed but clustered in certain regions  
205 (Figure 3B-D). Observed clustering patterns were similar in all analysed samples (Figure 3B-  
206 D).

207

208 In order to investigate the influence of the different genomic features on DNA methylation  
209 we determined the distribution and density of mCs on 82 randomly selected genes  
210 (Supplementary Table 3) (exons and introns), and promoters (defined here as 1.5 kb upstream

211 of the Transcription Starting Site (TSS)). This analysis showed that on the randomly selected  
212 genes mC proportion peaks 250bp upstream of TSS and decreases sharply before of the start  
213 of the coding sequences (Figure 4). When the different time points were compared at this site,  
214 mC showed an increase (T1<T8<T8P) in parallel with that observed at a whole genome level  
215 (Figure 3A).

216

217 The same methylation density analysis was then carried out for five loci corresponding to  
218 four housekeeping genes in *Botrytis* (i.e., G3PDH (Glyceraldehyde 3-phosphate  
219 dehydrogenase) (BC1G\_09523.1); HSP60 (Heat Shock Protein 60) (BC1G\_09341.1); Actin  
220 (BC1G\_08198.1 and BC1G\_01381.1) and Beta Tubulin (BC1G\_00122.1). All five Loci  
221 present low levels of DNA methylation in every context and no changes in DNA methylation  
222 were observed between time points (i.e., T1, T8 and T8P) (Data not shown).

223

224 Finally, methylation density was analysed on 131 genes encoding putative CAZymes secreted  
225 by *B. cinerea* upon plant infection (Supplementary Table 3) (28). As a whole, these genes  
226 showed the same methylation pattern as described above for the 82 randomly selected genes  
227 with an increase in methylation upstream of the TSS (Figure 5A). More interestingly, these  
228 genes showed higher levels of methylation after 8 months in culture than at T1 and aT8P.  
229 This observed increase in global methylation on T8 samples seems to be due to an increase  
230 on the CHG and CG (Figure 5B-C) contexts. Conversely, CHH (Figure 5D) showed higher  
231 levels of methylation on the T8P samples, following the general trend observed both at a  
232 whole genome level (Figure 3A) and by the randomly selected genes (Figure 4).

233

234 **Detection of culture induced DMRs**

235 In order to identify the loci presenting significant DMRs between culture times (T1, T8 and  
236 T8P) we compared the methylation levels across the whole genome of all samples using a  
237 sliding window analysis conducted using swDMR software  
238 (<https://code.google.com/p/swdmr/>). The significance of the observed DMRs was determined  
239 using a three sample Kruskal-Wallis test. Analysis of DMR length distribution showed  
240 DMRs sizes ranging from 12 to 4994bp (Figure 6A). This approach identified 2822 regions  
241 significantly differentially methylated in one of the samples compared to the other two for all  
242 mCs (Table 2, Supplementary Table 4). The analysis of the methylation levels on DMRs  
243 suggests these suffer a decrease in methylation in all contexts (CG, CHG and CHH) during  
244 time in culture (from T1 to T8) followed by a recovery of DNA methylation levels after  
245 culture on *A. thaliana* (T8P) (Figure 6b). However, T8 showed a larger number of outlier  
246 DMRs showing levels of methylation significantly higher than the average (Figure 6B).  
247 When studied individually, changes in methylation within DMRs between samples presented  
248 two main pattern types (Table 2, Supplementary Table 4): **1.** 57.3% of the detected DMRs  
249 showed a recovery pattern after samples culturing in *A. thaliana*. (i.e., Level of methylation  
250 was not significantly different between T1 and T8P samples but they were higher or lower  
251 than T8 (T1=T8P <> T8 (FDR < 0.01))). **2.** The rest of the DMRs showed a non-recovery  
252 pattern (i.e., T1 <> T8P (FDR < 0.01)). Two subtypes were found for DMRs showing a DNA  
253 methylation recovery pattern: **1.** DMRs showing an increase in methylation with time in  
254 culture (T1=T8P < T8 (26.82%) (defined as Type 0 hereafter) and **2.** DMRs showing a  
255 decrease in methylation level with time in culture (T1=T8P > T8 (30.47%)) (Type 2).  
256 Equally, non-recovery DMRs can be divided into two categories: **1.** DMRs showing a  
257 decrease in methylation level with time in culture and no change in methylation level when  
258 culture on *A. thaliana* (T0 > T7 = T7P (16.02%)) (Type 1a) and **2.** DMRs not showing changes  
259 in methylation level during culture but an increase in methylation level when cultured on *A.*

260 *thaliana* (T0=T7<T7P (26.68%)) (Type 1b). Interestingly the expected pattern where DMRs  
261 showed an increase in methylation level with time in culture and no change in methylation  
262 level when cultured on *A. thaliana* (T1<T8=T8P) was not observed.

263

264 2384 (84.5%) of the total detected DMRs for all mCs overlapped with 3055 *B. cinerea* (Table  
265 3) while 438 (15.5%) mapped to intergenic regions. Of the 3055 genic regions overlapping  
266 with DMRs, 1709 (56%) were promoters (considered here 1.5kb before TSS) and 2994  
267 (98%) were body of genes (with 1648 (53.9%) genes overlapping with a DMR both on the  
268 promoter and the gene body) (Table 3, Supplementary Table 5). The same analyses were  
269 carried out to detect DMRs for CG, CHG and CHH (where H is A, C or T) contexts. This  
270 generated 70, 82 and 1248 DMRs respectively for each context (Table 3, Supplementary  
271 Table 4). Of these, 91.4% (CG), 89.0% (CHG) and 85.2% (CHH) overlapped with 68, 84 and  
272 1339 genes respectively (Table 4, Supplementary Table 5).

273

274 Finally, we conducted a search for DMRs overlapping with 1577 *B. cinerea* genes with  
275 known function including: secondary metabolism (i.e. sesquiterpenecyclases,  
276 diterpenecyclases, paxillin-like enzymes, fusicocin-like enzymes, Phytoene synthases, non-  
277 ribosomal peptide synthetases, polyketides synthases, chalcone synthases, DiMethylAllyl  
278 Tryptophan Synthases) (26), conidiation (26), sclerotium formation (25), mating and fruit  
279 body development (26), apoptosis (26), housekeeping (26), signalling pathways genes (G  
280 protein-coupled receptors, MAP kinases, heterotrimeric G proteins, cAMP signalling  
281 components and Ca<sup>2+</sup>-related signalling) (26) and virulence *sensu lato* genes (147 genes  
282 were duplicated, i.e., present in more than one category). The virulence *sensu lato* genes  
283 included: 12 appressorium-associated genes (26), 17 virulence *sensu stricto* genes (27)

284 and 1155 plant cell wall disassembly genes (CAZyme genes) (28). Of these, 478 genes  
285 (30.3%) overlapped with one or more detected DMRs (See Table 1 and Supplementary Table  
286 6 for a comprehensive list of genes overlapping with DMRs).

287

## 288 **Discussion**

289 Previous studies have shown that protracted *in vitro* culture of pathogenic fungi reduces  
290 virulence (6–9) and that virulence levels recover after a single passage on their host in a  
291 significant number of species (5). This loss/recovery of virulence cycle suggests a plastic  
292 regulation of the trait. However, very little is known about why virulence degenerates in  
293 culture or what are the molecular mechanisms regulating these changes. In this study, we  
294 present, to our knowledge, the first proof that global and local changes in DNA  
295 methylation are linked to virulence changes during *in vitro* culture. Furthermore, here we  
296 present the first DNA methylome for the plant pathogen *B. cinerea*.

297

298 As expected, we found that virulence of *B. cinerea* cultures significantly decreases with  
299 culture age, and that virulence levels recover after one passage on *A. thaliana*. More  
300 surprisingly, analysis of global methylation pattern changes using MSAP profiles showed an  
301 increasing deviation from the original profiles with time in culture. This observed  
302 accumulation of somaclonal variation as culture progressed showed a positive linear  
303 correlation with the observed changes in virulence ( $R^2=0.5$ ,  $P=0.002$  and  $R^2=0.5$   $P=0.007$ , for  
304 epigenetic distances calculated using *HpaII* and *MspI* respectively). Such correlation between  
305 time in culture and genetic/epigenetic somaclonal variation is consistent with accumulation of  
306 sequence and/or DNA methylation changes with time in culture as previously reported for  
307 other species when cultivated *in vitro* (15,29). Moreover, these results are consistent with

308 previous reports of high levels of somaclonal variability appearing during *in vitro* culture of  
309 phytopathogenic fungi, which affect the level of virulence of the culture isolates (30).  
310 However, the detected genetic/epigenetic distance after eight months in culture (T8)  
311 significantly decreased after a single passage of the cultured fungus on *A. thaliana* (T8P)  
312 suggesting a plastic change in virulence that cannot be explained only by genetic causes.

313

314 Whole genome resequencing of six DNA samples taken at two time points (one month and  
315 eight month) yielded a total of 2,331 variants of which 454 were within genes. Interestingly,  
316 only these included 198 non-synonymous mutations (193 causing missense variations and  
317 five causing premature stop codons (non-sense mutations). We then examined the appearance  
318 of genetic variants in 1577 *B. cinerea* genes with known function of which only 4.3% showed  
319 variants. Moreover just eight genes (0.5% of the total) presented variants that were not silent  
320 mutations, or led to a conservative missense codon or a synonymous codon. Of the 1184  
321 genes associated to virulence included in the analysis, a similar proportion (0.5%) presented a  
322 variant that could affect the virulence phenotype. All of these genes were plant cell wall  
323 disassembly genes (CAZyme genes (31)). This low level of detected genetic variants and  
324 specially the lack of variants on virulence *sensu stricto* genes induced by protracted *in vitro*  
325 culture suggests that genetic variation might not be the only cause of virulence loss during *in vitro*  
326 culture of *B. cinerea* as shown previously for other species (25).

327

328 This suggests that changes in DNA methylation at a genome level could be associated to the  
329 observed loss of virulence during *in vitro* culture. To validate this hypothesis we carried out  
330 the sequencing of the methylomes of nine samples from three culture time points (T1, T8 and  
331 T8P). In average all genomes presented low levels of DNA methylation (0.6%) as reported

332 for other fungal species (21). DNA methylation was not evenly distributed across contigs but  
333 clustered in certain regions following a mosaic pattern (32) with higher levels of methylation  
334 in regions with lower abundance of genes. Such clustering patterns have been previously  
335 observed in pathogenic fungi linked to transposable elements rich and gene poor regions (19)  
336 and have been shown to be dynamic following fungal development (19). Interestingly, the  
337 observed clustering patterns were similar in all analysed culture time points suggesting that  
338 the methylation changes detected here are not associated to progression in development  
339 occurred during culture. However, global methylation levels varied with sequence context  
340 (with CHH > CG > CHG) and time in culture. In brief, global methylation levels on CGs and  
341 CHGs increased significantly between 1 (T1) and 8 (T8) months in culture. In both cases,  
342 methylation showed a decreasing trend (not significant) on samples recovered from 8 months  
343 old cultures inoculated onto *A. thaliana* (T8P). This observed change in methylation levels  
344 supports MSAP results that showed an increase of epigenetic variation with time in culture  
345 that was only partially recovered in T8P cultures.

346

347 Previous genome wide studies have shown that gene methylation in the monophyletic  
348 Ascomycota phylum varies greatly. For example, in *Neurospora crassa* DNA methylation is  
349 not found in gene bodies. However gene body methylation has been reported in other species  
350 such as, *Candida albicans*, *Uncinocarpus reesii* and *Magnaporthe oryza* (16,19,21) while  
351 promoter methylation has only been reported in *M. oryza* (19). Analysis of the effect of  
352 methylation distribution and density on gene expression has shown that gene body  
353 methylation has positive effects on gene expression (19,21) while promoter methylation has a  
354 negative effect (19). Our analysis of methylation distribution in *B. cinerea* genes showed an  
355 increase in methylation approximately 800bp upstream of the TSS followed by a sharp  
356 decrease at the TSS as shown by Jeon et al (2015) in *M. oryza* mycelia. More interestingly,

357 CAZyme genes showed a second increase in methylation density after the TSS indicating that  
358 at least some *B. cinerea* genes present gene body methylation.

359

360 Comparative analysis between culture time points showed that while house-keeping genes  
361 did not show changes in DNA methylation density between culture time points, both the  
362 randomly selected and the CAZyme genes showed an increase in promoter methylation with  
363 time in culture similar to that observed at a whole genome scale (i.e.  $T1 < T8$ ). However,  
364 CAZyme genes showed a recovery (not observed on the randomly selected genes) of the  
365 original methylation levels after a single passage on *A. thaliana* (i.e.  $T1 = T8P < T8$ ).  
366 Conversely, global methylation levels on the CAZyme gene bodies showed a positive  
367 correlation with virulence levels ( $T1 = T8P > T8$ ). This observed increase in promoter  
368 methylation on T8 samples seems to be due to an increase on the CHG and CG contexts,  
369 while higher gene body methylation on T1 and T8P samples seem to be due to changes on the  
370 CHH context. CAZyme genes encode proteins that breakdown, biosynthesise and modify  
371 plant cell wall components and are highly expressed during plant invasion in *B. cinerea*  
372 (28,31). This gene family, should therefore, be readily accessible to the transcriptional  
373 machinery in the virulent form of pathogenic fungi. Interestingly, our results show a  
374 correlation between virulence levels in T1, T8 and T8P samples and methylation features in  
375 CAZyme genes that have positive effects on gene expression, i.e. high gene body  
376 methylation (19,21) and low promoter methylation (19) in high virulence cultures (T1 and  
377 T8P) and the opposite in the low virulence culture (T8).

378

379 To determine the significance of the observed changes in DNA methylation between culture  
380 time points we performed an analysis of regional differential methylation identifying 2822



381 significant DMRs in one time point compared to the other two for all mCs. Globally, DMRs  
382 show a decrease in methylation between T1 to T8 in all contexts (CG, CHG and CHH)  
383 followed by a recovery of DNA methylation levels after culture on *A. thaliana* (T8P). This  
384 seem to contradict the observed changes in global DNA methylation levels which showed an  
385 increasing trend (T1<T8<T8P). However, T8 showed a larger number of outlier DMRs  
386 showing levels of methylation significantly higher than the average suggesting that not all  
387 predicted DMRs followed the same pattern of demethylation followed by remethylation.  
388 Furthermore, similar differences between global and local DNA methylation levels have been  
389 reported previously in different organisms (19,33). More importantly, 68.3% of the culture  
390 induced DNA methylation changes (i.e. Type 0, 2 and 1a, which accounts for 57.3% of the  
391 total detected DMRs) showed a recovery pattern after samples culturing in *A. thaliana*.  
392 Suggesting that a majority of the epigenetic changes accumulated during *in vitro* culture are  
393 reset to their original state after a single passage on the host. Interestingly, 26.7% of the  
394 observed changes (Type 1b) were not induced *in vitro* culture but by the host. This highlights,  
395 as shown before in other pathogens (2,34,35), the importance of epigenetic mechanisms in  
396 host/pathogen interactions.

397

398 Of the total detected DMRs for all mCs 84.5% overlapped with one or more genes suggesting  
399 that the great majority of *in vitro* culture induced DNA methylation changes happen on genic  
400 regions. This overlap of individual DMRs with one than more gene is probably partially due  
401 to the small average size of intergenic regions (778 to 958bp) and genes (744 to 804 bp) in *B.*  
402 *cinerea* (26). Analysis of DMRs overlapping with 1577 genes with known function revealed  
403 that 30.3% of the total overlapped with DMRs. Ten gene functional groups (house-keeping,  
404 apoptosis, conidiation, mating and fruit body development, secondary metabolism, signaling,  
405 sclerotium formation, appressorium formation, virulence and CAZYme genes). House-

406 keeping genes did not overlap with any DMRs while genes associated to apoptosis and  
407 conidiation showed the higher percentage of overlapping with DMRs (40.0 And 37.5%  
408 respectively). Remarkably, both biological processes have been previously shown to be  
409 affected by DNA methylation (19,36,37). Interestingly, the 98% of these DMRs overlapped,  
410 at least partially, with gene bodies while 2.4% and 15.6% overlapped only with promoters or  
411 gene bodies respectively. Taken collectively, this indicates that *B. cinerea* genes in general  
412 and gene bodies in particular are epigenetically plastic genomic regions in *B. cinerea*. More  
413 remarkably, when DMRs were defined using each DNA methylation context independently  
414 (i.e. CG, CHG and CHH), the large majority (89.1% of all DMRs and 89.9% of those  
415 overlapping with genes) were linked to changes on the CHH context, which suggests that  
416 DMRs in this context are the reason for the observed changes in detected CAZyme gene body  
417 methylation associated to higher levels of virulence.

418

419 Interestingly, similar regional changes in DNA methylation have been previously associated  
420 to the developmental potency of fungal cells (19). In their work, Jeon et al (2015) showed  
421 how fungal totipotent cells (mycelia) present higher global methylation levels while cells  
422 determined to host penetration (appresoria) present a higher number of genes with methylated  
423 cytosines but lower global levels of DNA methylation. Changes of global levels of DNA  
424 methylation have also been previously reported between the free-living and symbiotic forms  
425 of the plant ectomycorrhizal (EcM) fungus *Tuber melanosporum* (38) and in the *Cladonia*  
426 lichen fungus (20). In both cases, the genomes of the culture free mycelia presented lower  
427 levels of DNA methylation when compared to the genomes of the fungal tissues associated to  
428 the plant (38) or the algae (20) respectively. Conversely, our results suggest that protracted  
429 culture of *B. cinerea* induces a hypermethylated, low pathogenic free-living form adapted to  
430 the absence of the host or the abundance of nutrients in the culture media. Remarkably,

431 dynamic DNA methylation has been proposed as regulator of phenotypic plasticity in  
432 response to nutrient availability and interaction with the host (39).

433 Although the presence of both hypermethylation and hypomethylation on the free living  
434 forms of pathogenic and symbiotic fungi could be intuitively contradictory, our results could  
435 better understood if fungal lifestyles (saprotrophism, symbiosis and pathogenesis) are  
436 considered as part of a continuum (40). In this model we propose that global DNA  
437 methylation levels are inversely correlated to environmental challenge. Low environmental  
438 challenge induces high levels of methylation that in turn reduce the expression of genes. On  
439 the contrary, DNA methylation decreases as environmental challenge increases allowing the  
440 expression of genes needed to confront such challenge (Figure 7). In fact, genome expansion  
441 by proliferation of transposable elements (TEs), which induces genome hypermethylation  
442 (19), has been associated to the evolution of obligated pathogenic fungi from saprotrophic  
443 species (40). Moreover, hypomethylation of TEs found within 1 kb of a gene has been  
444 associated to increased gene expression in TE rich plant-symbiotic fungi (38). It is tempting  
445 to speculate that the observed change in global and local levels of DNA methylation during *in*  
446 *vitro* culture could be part of a mechanism that confers plasticity to the *B. cinerea* genome to  
447 adapt to different environments (i.e. high/low levels of available nutrients or  
448 presence/absence of a host). Butt et al (2006) proposed that *in vitro* culture induced loss of  
449 virulence could be the reflexion of an adaptive trait selected to promote energy efficiency i.e.  
450 by turning off virulence genes in the absence of the host or in environments rich in freely  
451 available nutrients. The authors also proposed that this trait could become maladaptive since  
452 it restricts the pathogen to a saprophytic mode (5). Environmentally induced epigenetic  
453 adaptive changes have been predicted to have the potential to induce evolutionary traps  
454 leading to maladaptation (41,42). However, in this case the complete reversibility of the

455 reduced virulence phenotype induced by protracted culture suggests that this might not be the  
456 case.

457

458 In our view, the availability of an increasingly large number of sequenced genomes and  
459 methylomes from pathogenic fungi together with our ability to decipher the associations  
460 between changes in DNA methylation and virulence will stimulate our understanding of the  
461 mechanisms involved in the control of pathogenicity on these species. Moreover, the analysis  
462 of DMRs could potentially be used to predict gene function in non-model fungal species or  
463 even to predict pathogenicity in wild strains. More importantly, if the epigenetic regulation of  
464 the transition between the pathogenic and the saprotrophic states that we propose here applies  
465 broadly to other pathogenic fungi, our findings will open the door to a new type of non-lethal  
466 fungicide aimed at maintaining pathogenic fungi as saprotrophic that by its nature would  
467 reduce the appearance of resistant strains.

468

## 469 **Materials and Methods**

### 470 ***Botrytis cinerea* culture and inoculation**

471 7 *Botrytis cinerea* cultures (IMI169558 isolate (43)) were initiated from a single frozen  
472 inoculum and cultured and harvested for 32 weeks as stated in Johnson et al (44). After 4  
473 weeks in culture (T0) the initial culture was subcultured to 7 plates containing fresh medium.  
474 Mycelium from each plate was subsequently subcultured every 4 weeks (1 month hereafter)  
475 to fresh medium. A mycelium sample was taken for DNA extraction from all replicates and  
476 conidia harvested for virulence analysis (44) from five replicates at every subculture. For  
477 assessments of infection phenotypes, single leaves from five *Arabidopsis thaliana* Col 0  
478 plants (leaf stage 7 or 8 as defined by (45)) were inoculated with 5 µl of spore suspension

479 collected at each subculture time (T0-T8), pipetted onto the adaxial surface of the leaf.  
480 Controls were inoculated with PDB. Finally, after the T8 challenge, *B. cinerea* was isolated  
481 from the infected areas, cultured and immediately used to challenge *A. thaliana* plants to test  
482 virulence recovery (Figure S1) (T8P). Plants remained under Stewart Micropropagators to  
483 sustain a relative humidity of 50–80% and lightly watered every 24 h.

484

#### 485 **Plant material**

486 *A. thaliana* Col-0 seeds were obtained from the Nottingham Arabidopsis Stock Centre  
487 (NASC). Plants were cultivated as stated in (46) in Levington Universal compost in trays  
488 with 24-compartment inserts. Plants were maintained in Conviron (Controlled Environments  
489 Ltd) growth rooms at 24 C with a light intensity of 110  $\mu\text{mol m}^{-2} \text{s}^{-2}$  and an 8 h photoperiod  
490 for 4 weeks. For ease of treatment, plants were transferred to Polysec growth rooms (Polysec  
491 Cold Rooms Ltd, UK; <http://www.polysec.co.uk/>), maintained at the same conditions.

492

#### 493 **DNA isolation**

494 126 *B. cinerea* genomic DNA (gDNA) extractions were performed (from 2 replicates of each  
495 of the 7 plates at *in vitro* time point (T1-T8) and from of the last time point culture  
496 transplanted onto to *A. thaliana* (T8P)) using the DNeasy 96 Plant Kit (Qiagen, Valencia,  
497 CA) and the Mixer Mill MM 300 (Retsch, Germany). Isolated DNA was diluted in nanopure  
498 water to produce working stocks of 10  $\text{ng} \cdot \mu\text{l}^{-1}$ . DNA from *B. cinerea* inoculated *A. thaliana*  
499 was extracted from five leaf samples at each time point of using a DNeasy Mini Kit (Qiagen,  
500 Valencia, CA) and the Mixer Mill MM 300 (Retsch, Germany). DNA samples were diluted  
501 to 1  $\text{ng} \cdot \mu\text{l}^{-1}$  nanopure water.

502

### 503 **Scoring *B. cinerea* lesion phenotypes**

504 Disease lesions were assessed 3 days post inoculation. A weighted scoring method was used  
505 to categorize *B. cinerea* lesion phenotypes (47). High virulence symptoms (water-soaking,  
506 chlorosis, and spreading necrosis) were conferred a range of positive scores and the resistant  
507 symptoms (necrosis limited to inoculation site) were given negative scores (Figure 1A). A  
508 weighted score was produced arithmetically from the lesion scores of replicates. Inoculated  
509 *A. thaliana* leaves at T0, T8 and T8P were collected 3 days after inoculation for estimation of  
510 *in planta* fungal development by quantitative PCR (**Figure S1**).

511

### 512 **Estimation of *in planta* fungal development by quantitative PCR**

513 Quantitative real-time PCR (qPCR) reactions (25 µl) were prepared by mixing 10 µl DNA  
514 solution with 12.5 µl of SYBR™ Green Mastermix (Applied Biosystems, UK) and primers  
515 (to a final concentration of 300 nM). Primer for Arabidopsis to generated a 131 bp amplicon  
516 of the Shaggy-kinase-like gene (ASK) ((iASK1: CTTATCGGATTTCTCTATGTTTGGC;  
517 iASK2: GAGCTCCTGTTTATTTAACTTGTACATACC). Primers for *B. cinerea*. (CG11:  
518 AGCCTTATGTCCCTTCCCTTG; CG12: GAAGAGAAATGGAAAATGGTGAG to  
519 generated a Cutinase A gene 58 bp amplicon (24). qPCRs were carried out using a Bio-Rad  
520 ABI7300 thermocycler amplifying using the following conditions: 15 min at 95 °C followed  
521 by 50 cycles of 95 °C for 15 s, 58 °C for 30 s and 72 °C for 1 min. This was followed by a  
522 dissociation (melting curve), according to the software procedure. Serial dilutions of pure  
523 genomic DNA from each species were used to trace a calibration curve, which was used to  
524 quantify plant and fungal DNA in each sample. Results were expressed as the CG11/iASK  
525 ratio of mock-inoculated samples.

526

## 527 **MSAP procedure**

528 We used a modification of the MSAP methods (48,49) to reveal global variability in CG  
529 methylation patterns between *B. cinerea* samples. A total of 14 samples per time point (T1 to  
530 T7P) were analysed (2 replicated DNA extractions per culture plate). For each individual  
531 sample, 50ng of DNA were digested and ligated for 2 h at 37°C using 5U of *EcoRI* and 1U of  
532 *MspI* or *HpaII* (New England Biolabs), 0.45 µM *EcoRI* adaptor, 4.5 µM *HpaII* adaptor  
533 (Supplementary Table 7 for oligonucleotide sequences) and 1U of T4 DNA ligase (Sigma) in  
534 11 µl total volume of 1X T4 DNA ligase buffer (Sigma), 1µl of 0.5M NaCl, supplemented  
535 with 0.5 µl at 1mg/ml of BSA. Enzymes were then inactivated by heating to 75°C for 15 min.  
536 Following restriction and adaptor ligation there followed two successive rounds of PCR  
537 amplification. For preselective amplification, 0.3 µl of the restriction/ligation products  
538 described above were incubated in 12.5 µl volumes containing 1X Biomix (Bioline, London,  
539 UK) with 0.05 µl of Preamp *EcoRI* primer and 0.25 µl Preamp *HpaII/MspI* (both primers at  
540 10 uM) (Supplementary Table 7) supplemented with 0.1 µl at 1mg/ml of BSA. PCR  
541 conditions were 2 min at 72\_C followed by 30 cycles of 94\_C for 30 s, 56\_C for 30 s and  
542 72\_C for 2 min with a final extension step of 10 min at 72°C. Selective PCR reactions were  
543 performed using 0.3 µl of preselective PCR reaction product and the same reagents as the  
544 preselective reactions but using FAM labelled selective primers (E2/H1; Supplementary  
545 Table 7). Cycling conditions for selective PCR were as follows: 94°C for 2 min, 13 cycles of  
546 94°C for 30 s, 65°C (decreasing by 0.7°C each cycle) for 30 s, and 72°C for 2 min, followed  
547 by 24 cycles of 94°C for 30 s, 56°C for 30 s, and 72°C for 2min, ending with 72°C for 10  
548 min. Fluorescently labelled MSAP products were diluted 1:10 in nanopure sterile water and 1  
549 µl was combined with 1 µl of ROX/HiDi mix (50 µl ROX plus 1 ml of HiDiformamide,  
550 Applied Biosystems, USA). Samples were heat-denatured at 95°C for 3–5 min and snap-

551 cooled on ice for 2 min. Samples were fractionated on an ABI PRISM 3100 at 3 kV for 22 s  
552 and at 15 kV for 45 min.

553

#### 554 **Analysis of genetic/epigenetic variability during time in culture using MSAP**

555 MSAP profiles were visualized using GeneMapper Software v4 (Applied Biosystems, Foster  
556 City, CA). A qualitative analysis was carried out in which epiloci were scored as “present”  
557 (1) or “absent” (0) to form a presence/absence binary matrix. The selection of MSAP  
558 fragments was limited to allelic sizes between 80 and 585bp to reduce the potential impact of  
559 size homoplasmy (50). Samples were grouped according to the time in culture when they were  
560 collected (1, 2, 3, 4, 5, 6, 7, 8 months and 8 months and inoculation onto *A. thaliana* called  
561 T1, T2, T3, T4, T5, T6, T7 and T7P hereafter). MSAP profile polymorphisms between DNA  
562 samples from different culture time points were considered as *in vitro* culture induced  
563 methylation differences.

564

565 Epigenetic similarity between tested samples based on profiles obtained from primer  
566 combination E2/H1 and both enzymes (*HpaII* and *MspI*) was first visualized using Principal  
567 Coordinate Analysis (PCoA) (51) using GenAlex (v.6.4) (52). We then used Analysis of  
568 Molecular Variance (AMOVA) (53) to evaluate the structure and degree of epigenetic  
569 diversity induced by different times in culture. Pairwise PhiPT (54) comparisons between  
570 samples restricted with *HpaII* or *MspI* from each time point and the samples after the first  
571 passage (2 months in culture, T1) were used to infer their overall level of divergence in DNA  
572 methylation with time in culture (i.e., the lower the PhiPT value between samples T1  
573 restricted using *HpaII* or *MspI* the smaller the differentiation induced by culture and the same  
574 samples). AMOVA was subsequently calculated using GenAlex (v.6.5) to test the



575 significance of PhiPT between populations (54), with the probability of non-differentiation  
576 (PhiPT=0) being estimated over 9,999 random permutations.

577

578 Mantle test analysis was used to estimate the correlation between the calculated pairwise  
579 genetic/epigenetic distances and the difference in virulence between culture time points. The  
580 level of significance was assigned estimated over 9,999 random permutations tests, as  
581 implemented in Genalex v6.5.

582

### 583 **Methylation analysis by bisulphite sequencing**

584 DNA from 9 biological replicates from culture of two different ages (1, 8 months) and from 9  
585 replicates of tissue recovered from samples culture for eight months and the inoculated onto  
586 an *A. thaliana* plant were randomly selected for sequencing. Biological replicates were used  
587 to generate 3 pooled samples per culture age. Bisulphite treatment was performed  
588 independently from 50ng of genomic DNA of each pooled sample using the EZ DNA  
589 methylation-Gold™ Kit (Zymo Research) according to the manufacturers' instructions  
590 adjusting the final column purification elution volume to 10 µl. Following Bisulphite  
591 treatment, recovered DNA from each pool was used to estimate yield using a NanoDrop 100  
592 spectrophotometer with the RNA setting. The remaining bisulphite treated sample were then  
593 used to create a sequencing library using the EpiGnome™ Methyl-Seq Kit (Epicentre)  
594 according to manufacturer's instructions and using EpiGnome™ Index PCR Primers (4-12).

595 In order to provide a reference draft sequence for the alignment of the bisulphite treated DNA  
596 and to detect any culture induced genetic variability, 10 ng of native (non-bisulphite treated)  
597 DNA extracted from 3 independent cultures from two time points (1 month (T1) and 8 month  
598 (T8)) were pooled by time point, sequenced and compared to the *B. cinerea* B05.10 genome

599 sequence. Sequencing libraries were prepared using the EpiGnome™ Methyl-Seq Kit  
600 (Epicentre) according to manufacturer's instructions. Native DNA libraries were uniquely  
601 indexed using EpiGnome™ Index PCR Primers (Epicentre) (1-3).

602

603 Library yield was determined by Qubit dsDNA High Sensitivity Assay Kit. Agilent 2100  
604 Bioanalyzer High-Sensitivity DNA Chip was used to assess library quality and determine  
605 average insert size. Libraries were then pooled and sequenced on Illumina HiSeq 2000  
606 (Illumina Inc., San Diego, CA) using 100bp paired end V3 chemistry by QBI Centre for  
607 Brain Genomics.

608

#### 609 **Sequence analysis and differential methylation analysis**

610 Obtained sequencing reads were trimmed to remove adaptors using *TrimGalore!*  
611 ([http://www.bioinformatics.babraham.ac.uk/projects/trim\\_galore](http://www.bioinformatics.babraham.ac.uk/projects/trim_galore)) and *Cutadapt* (55). Whole  
612 genome re-sequencing reads were aligned to the published genome from *B. cinerea* B05.10  
613 (Broad Institute's *B. cinerea* Sequencing Project; [https://www.broadinstitute.org/scientific-](https://www.broadinstitute.org/scientific-community/science/projects/fungal-genome-initiative/botrytis-cinerea-genome-project)  
614 [community/science/projects/fungal-genome-initiative/botrytis-cinerea-genome-project](https://www.broadinstitute.org/scientific-community/science/projects/fungal-genome-initiative/botrytis-cinerea-genome-project)) using  
615 *bowtie2* (56) and variants were called using *freebayes* (57). Variant categories were analysed  
616 using *CooVar* (58), *bedtools* (59) and custom scripts. Bisulfite treated libraries were mapped  
617 using Bismark (Krueger and Andrews, 2011) and bowtie2, duplicates removed and  
618 methylation calls were extracted using samtools (60) and in-house scripts. Bisulfite  
619 sequencing efficiency was calculated by aligning reads to the *B. cinerea* mitochondrial  
620 genome scaffold (B05.10) and identifying non-bisulfite converted bases. Differentially  
621 methylated regions were called using a sliding window approach described in swDMR  
622 (<https://code.google.com/p/swdmr/>) using and Kruskal-Wallis (3 sample) statistical tests.

623

624 **Author contributions:**

625 J.B. did sequence data analysis and helped drafting the manuscript. A.S. cultured the *Botrytis*  
626 samples and performed the virulence analysis. A.A. undertook the estimations of *in planta*  
627 fungal develop using qPCR. M.W. and L.A.J.M. helped to conceive the study and drafting  
628 the manuscript. C.M.R.L. conceived the study, carried out all nucleic acid extractions,  
629 performed and analysed the MSAPs, performed and assisted analysing the native and  
630 bisulfite treated DNA sequencing and wrote the manuscript. All authors have read and  
631 approved the final manuscript.

632

633 **Acknowledgements**

634 Janette Edson @ QBI

635

636

637 **Bibliography**

- 638 1. Fournier E, Gladieux P, Giraud T. The “Dr Jekyll and Mr Hyde fungus”: noble rot  
639 versus gray mold symptoms of *Botrytis cinerea* on grapes. *Evol Appl*. 2013  
640 Sep;6(6):960–969.
- 641 2. Weiberg A, Wang M, Lin FM, Zhao H, Zhang Z, Kaloshian I, et al. Fungal small RNAs  
642 suppress plant immunity by hijacking host RNA interference pathways. *Science*. 2013  
643 Oct 4;342(6154):118–123.
- 644 3. Martinez F, Dubos B, Fermaud M. The Role of Saprotrophy and Virulence in the  
645 Population Dynamics of *Botrytis cinerea* in Vineyards. *Phytopathology*. 2005  
646 Jun;95(6):692–700.
- 647 4. Pathirana R, Cheah LH, Carimi F, Carra A. Low temperature stored in cryobank®  
648 maintains pathogenicity in grapevine. *cryoletters* [Internet]. 2009;30(1):84. Available  
649 from: [http://www.cryoletters.org/Abstracts\\_Vol30\\_1pp76-88.pdf](http://www.cryoletters.org/Abstracts_Vol30_1pp76-88.pdf)

- 650 5. Butt T, Wang C, Shah F, Hall R. DEGENERATION OF ENTOMOGENOUS FUNGI.  
651 In: EILENBERG J, HOKKANEN H, editors. An Ecological and Societal Approach to  
652 Biological Control. Dordrecht: Springer Netherlands; 2006. p. 213–226.
- 653 6. Castro M, Kramer K, Valdivia L, Ortiz S, Castillo A. A double-stranded RNA  
654 mycovirus confers hypovirulence-associated traits to *Botrytis cinerea*. *FEMS Microbiol*  
655 *Lett.* 2003 Nov 7;228(1):87–91.
- 656 7. Chu YM, Jeon JJ, Yea SJ, Kim YH, Yun SH, Lee YW, et al. Double-stranded RNA  
657 mycovirus from *Fusarium graminearum*. *Appl Environ Microbiol.* 2002  
658 May;68(5):2529–2534.
- 659 8. Hatta R, Ito K, Hosaki Y, Tanaka T, Tanaka A, Yamamoto M, et al. A conditionally  
660 dispensable chromosome controls host-specific pathogenicity in the fungal plant  
661 pathogen *Alternaria alternata*. *Genetics.* 2002 May;161(1):59–70.
- 662 9. Akamatsu H, Taga M, Kodama M, Johnson R, Otani H, Kohmoto K. Molecular  
663 karyotypes for *Alternaria* plant pathogens known to produce host-specific toxins. *Curr*  
664 *Genet.* 1999 Jul;35(6):647–656.
- 665 10. Kelly SA, Panhuis TM, Stoehr AM. Phenotypic plasticity: molecular mechanisms and  
666 adaptive significance. *Compr Physiol.* 2012 Apr;2(2):1417–1439.
- 667 11. WADDINGTON C. Canalization of Development and the Inheritance of Acquired  
668 Characters. *Nature.* 1942 Nov 14;150(3811):563–565.
- 669 12. Tricker PJ, Gibbings JG, Rodríguez López CM, Hadley P, Wilkinson MJ. Low relative  
670 humidity triggers RNA-directed de novo DNA methylation and suppression of genes  
671 controlling stomatal development. *J Exp Bot.* 2012 Jun;63(10):3799–3813.
- 672 13. Geyer KK, Rodríguez López CM, Chalmers IW, Munshi SE, Truscott M, Heald J, et al.  
673 Cytosine methylation regulates oviposition in the pathogenic blood fluke *Schistosoma*  
674 *mansonii*. *Nat Commun.* 2011 Aug 9;2:424.
- 675 14. Bird A. Perceptions of epigenetics. *Nature.* 2007 May 24;447(7143):396–398.
- 676 15. Rodríguez López CM, Wilkinson MJ. Epi-fingerprinting and epi-interventions for  
677 improved crop production and food quality. *Front Plant Sci.* 2015 Jun 5;6:397.
- 678 16. Su Z, Han L, Zhao Z. Conservation and divergence of DNA methylation in eukaryotes:  
679 new insights from single base-resolution DNA methylomes. *Epigenetics.* 2011 Feb  
680 1;6(2):134–140.
- 681 17. He XJ, Chen T, Zhu JK. Regulation and function of DNA methylation in plants and  
682 animals. *Cell Res.* 2011 Mar;21(3):442–465.
- 683 18. Jupe ER, Magill JM, Magill CW. Stage-specific DNA methylation in a fungal plant  
684 pathogen. *J Bacteriol.* 1986 Feb;165(2):420–423.

- 685 19. Jeon J, Choi J, Lee GW, Park SY, Huh A, Dean RA, et al. Genome-wide profiling of  
686 DNA methylation provides insights into epigenetic regulation of fungal development in  
687 a plant pathogenic fungus, *Magnaporthe oryzae*. *Sci Rep*. 2015 Feb 24;5:8567.
- 688 20. Armaleo D, Miao V. Symbiosis and DNA methylation in the *Cladonia* lichen fungus.  
689 Symbiosis [Internet]. 1999;26(2):143 – 163. Available from:  
690 <https://scholars.duke.edu/display/pub758042>
- 691 21. Zemach A, McDaniel IE, Silva P, Zilberman D. Genome-wide evolutionary analysis of  
692 eukaryotic DNA methylation. *Science*. 2010 May 14;328(5980):916–919.
- 693 22. Boyko A, Kovalchuk I. Genetic and epigenetic effects of plant-pathogen interactions:  
694 an evolutionary perspective. *Mol Plant*. 2011 Nov;4(6):1014–1023.
- 695 23. Reyna-López GE, Simpson J, Ruiz-Herrera J. Differences in DNA methylation patterns  
696 are detectable during the dimorphic transition of fungi by amplification of restriction  
697 polymorphisms. *Mol Gen Genet*. 1997 Feb 27;253(6):703–710.
- 698 24. Gachon C, Saindrenan P. Real-time PCR monitoring of fungal development in  
699 *Arabidopsis thaliana* infected by *Alternaria brassicicola* and *Botrytis cinerea*. *Plant*  
700 *Physiol Biochem*. 2004 May;42(5):367–371.
- 701 25. Jeon J, Choi J, Lee GW, Dean RA, Lee YH. Experimental evolution reveals genome-  
702 wide spectrum and dynamics of mutations in the rice blast fungus, *Magnaporthe oryzae*.  
703 *PLoS ONE*. 2013 May 31;8(5):e65416.
- 704 26. Amselem J, Cuomo CA, van Kan JA, Viaud M, Benito EP, Couloux A, et al. Genomic  
705 analysis of the necrotrophic fungal pathogens *Sclerotinia sclerotiorum* and *Botrytis*  
706 *cinerea*. *PLoS Genet*. 2011 Aug 18;7(8):e1002230.
- 707 27. Choquer M, Fournier E, Kunz C, Levis C, Pradier JM, Simon A, et al. *Botrytis cinerea*  
708 virulence factors: new insights into a necrotrophic and polyphageous pathogen. *FEMS*  
709 *Microbiol Lett*. 2007 Dec;277(1):1–10.
- 710 28. Blanco-Ulate B, Morales-Cruz A, Amrine KC, Labavitch JM, Powell AL, Cantu D.  
711 Genome-wide transcriptional profiling of *Botrytis cinerea* genes targeting plant cell  
712 walls during infections of different hosts. *Front Plant Sci*. 2014 Sep 3;5:435.
- 713 29. Rodríguez López CM, Wetten AC, Wilkinson MJ. Progressive erosion of genetic and  
714 epigenetic variation in callus-derived cocoa (*Theobroma cacao*) plants. *New Phytol*.  
715 2010 Jun;186(4):856–868.
- 716 30. Dahmen H, Staub T, Schwinn FJ. Technique for Long-Term Preservation of  
717 Phytopathogenic Fungi in Liquid Nitrogen. *Phytopathology*. 1983;73(2):241.
- 718 31. Lombard V, Golaconda Ramulu H, Drula E, Coutinho PM, Henrissat B. The  
719 carbohydrate-active enzymes database (CAZy) in 2013. *Nucleic Acids Res*. 2014  
720 Jan;42(Database issue):D490–D495.

- 721 32. Feng S, Cokus SJ, Zhang X, Chen PY, Bostick M, Goll MG, et al. Conservation and  
722 divergence of methylation patterning in plants and animals. *Proc Natl Acad Sci U S A*.  
723 2010 May 11;107(19):8689–8694.
- 724 33. Jung M, Pfeifer GP. Aging and DNA methylation. *BMC Biol*. 2015 Jan 31;13:7.
- 725 34. Gómez-Díaz E, Jordà M, Peinado MA, Rivero A. Epigenetics of host-pathogen  
726 interactions: the road ahead and the road behind. *PLoS Pathog*. 2012 Nov  
727 29;8(11):e1003007.
- 728 35. Cheeseman K, Weitzman JB. Host-parasite interactions: an intimate epigenetic  
729 relationship. *Cell Microbiol*. 2015 Aug;17(8):1121–1132.
- 730 36. Hervouet E, Cheray M, Vallette FM, Cartron PF. DNA methylation and apoptosis  
731 resistance in cancer cells. *Cells*. 2013 Jul 18;2(3):545–573.
- 732 37. Belden WJ, Lewis ZA, Selker EU, Loros JJ, Dunlap JC. CHD1 remodels chromatin and  
733 influences transient DNA methylation at the clock gene frequency. *PLoS Genet*. 2011  
734 Jul 21;7(7):e1002166.
- 735 38. Montanini B, Chen PY, Morselli M, Jaroszewicz A, Lopez D, Martin F, et al. Non-  
736 exhaustive DNA methylation-mediated transposon silencing in the black truffle  
737 genome, a complex fungal genome with massive repeat element content. *Genome Biol*.  
738 2014 Jul 31;15(7):411.
- 739 39. Mishra PK, Baum M, Carbon J. DNA methylation regulates phenotype-dependent  
740 transcriptional activity in *Candida albicans*. *Proc Natl Acad Sci U S A*. 2011 Jul  
741 19;108(29):11965–11970.
- 742 40. Veneault-Fourrey C, Martin F. Mutualistic interactions on a knife-edge between  
743 saprotrophy and pathogenesis. *Curr Opin Plant Biol*. 2011 Aug;14(4):444–450.
- 744 41. Consuegra del Olmo S, Rodriguez Lopez CM. Epigenetic-induced alterations in sex-  
745 ratios in response to climate change: an epigenetic trap? *BioEssays*.
- 746 42. O’Dea RE, Noble DWA, Johnson SL, Hesselson D, Nakagawa S. The role of non-  
747 genetic inheritance in evolutionary rescue: epigenetic buffering, heritable bet hedging  
748 and epigenetic traps. *Environmental epigenetics*. 2016;2(1):dvv014.
- 749 43. Thomma BP, Eggermont K, Tierens KF, Broekaert WF. Requirement of functional  
750 ethylene-insensitive 2 gene for efficient resistance of *Arabidopsis* to infection by  
751 *Botrytis cinerea*. *Plant Physiol*. 1999 Dec;121(4):1093–1102.
- 752 44. Johnson H, Lloyd A, Mur L, Smith A, Causton D. The application of MANOVA to  
753 analyse *Arabidopsis thaliana* metabolomic data from factorially designed experiments.  
754 *Metabolomics*. 2007 Nov 7;3(4):517–530.

- 755 45. Boyes DC, Zayed AM, Ascenzi R, McCaskill AJ, Hoffman NE, Davis KR, et al.  
756 Growth stage-based phenotypic analysis of Arabidopsis: a model for high throughput  
757 functional genomics in plants. *Plant Cell*. 2001 Jul;13(7):1499–1510.
- 758 46. Johnson H, Broadhurst D, Goodacre R, Smith A. Metabolic fingerprinting of salt-  
759 stressed tomatoes. *Phytochemistry*. 2003 Mar;62(6):919–928.
- 760 47. Lloyd AJ, William Allwood J, Winder CL, Dunn WB, Heald JK, Cristescu SM, et al.  
761 Metabolomic approaches reveal that cell wall modifications play a major role in  
762 ethylene-mediated resistance against *Botrytis cinerea*. *Plant J*. 2011 Sep;67(5):852–868.
- 763 48. Róis AS, Rodríguez López CM, Cortinhas A, Erben M, Espírito-Santo D, Wilkinson  
764 MJ, et al. Epigenetic rather than genetic factors may explain phenotypic divergence  
765 between coastal populations of diploid and tetraploid *Limonium* spp. (Plumbaginaceae)  
766 in Portugal. *BMC Plant Biol*. 2013 Dec 6;13:205.
- 767 49. Rodríguez López C, Morán P, Lago F, Espiñeira M, Beckmann M, Consuegra S.  
768 Detection and quantification of tissue of origin in salmon and veal products using  
769 methylation sensitive AFLPs. *Food Chem*. 2012 Apr;131(4):1493–1498.
- 770 50. Caballero A, Quesada H, Rolán-Alvarez E. Impact of amplified fragment length  
771 polymorphism size homoplasy on the estimation of population genetic diversity and the  
772 detection of selective loci. *Genetics*. 2008 May;179(1):539–554.
- 773 51. Gower JC. Some Distance Properties of Latent Root and Vector Methods Used in  
774 Multivariate Analysis. *Biometrika* [Internet]. 1966 Dec; Available from:  
775 <http://www.jstor.org/stable/2333639>
- 776 52. Peakall R, Smouse PE. GenAlEx 6.5: genetic analysis in Excel. Population genetic  
777 software for teaching and research--an update. *Bioinformatics*. 2012 Oct  
778 1;28(19):2537–2539.
- 779 53. Excoffier L, Smouse PE, Quattro JM. Analysis of molecular variance inferred from  
780 metric distances among DNA haplotypes: application to human mitochondrial DNA  
781 restriction data. *Genetics*. 1992 Jun;131(2):479–491.
- 782 54. Michalakis Y, Excoffier L. A generic estimation of population subdivision using  
783 distances between alleles with special reference for microsatellite loci. *Genetics*. 1996  
784 Mar;142(3):1061–1064.
- 785 55. Martin M. Cutadapt removes adapter sequences from high-throughput sequencing  
786 reads. *EMBnet.journal*. 2011 May 2;17(1):10.
- 787 56. Langmead B, Salzberg SL. Fast gapped-read alignment with Bowtie 2. *Nat Methods*.  
788 2012 Apr;9(4):357–359.
- 789 57. Garrison E, Marth G. Haplotype-based variant detection from short-read sequencing.  
790 2012 Jul 17; Available from: <https://arxiv.org/abs/1207.3907>



- 791 58. Vergara IA, Frech C, Chen N. CooVar: co-occurring variant analyzer. BMC Res Notes.  
792 2012 Nov 1;5:615.
- 793 59. Quinlan AR, Hall IM. BEDTools: a flexible suite of utilities for comparing genomic  
794 features. Bioinformatics. 2010 Mar 15;26(6):841–842.
- 795 60. Li H, Handsaker B, Wysoker A, Fennell T, Ruan J, Homer N, et al. The Sequence  
796 Alignment/Map format and SAMtools. Bioinformatics. 2009 Aug 15;25(16):2078–  
797 2079.
- 798
- 799



800 **FIGURES AND TABLES**

801

802

803

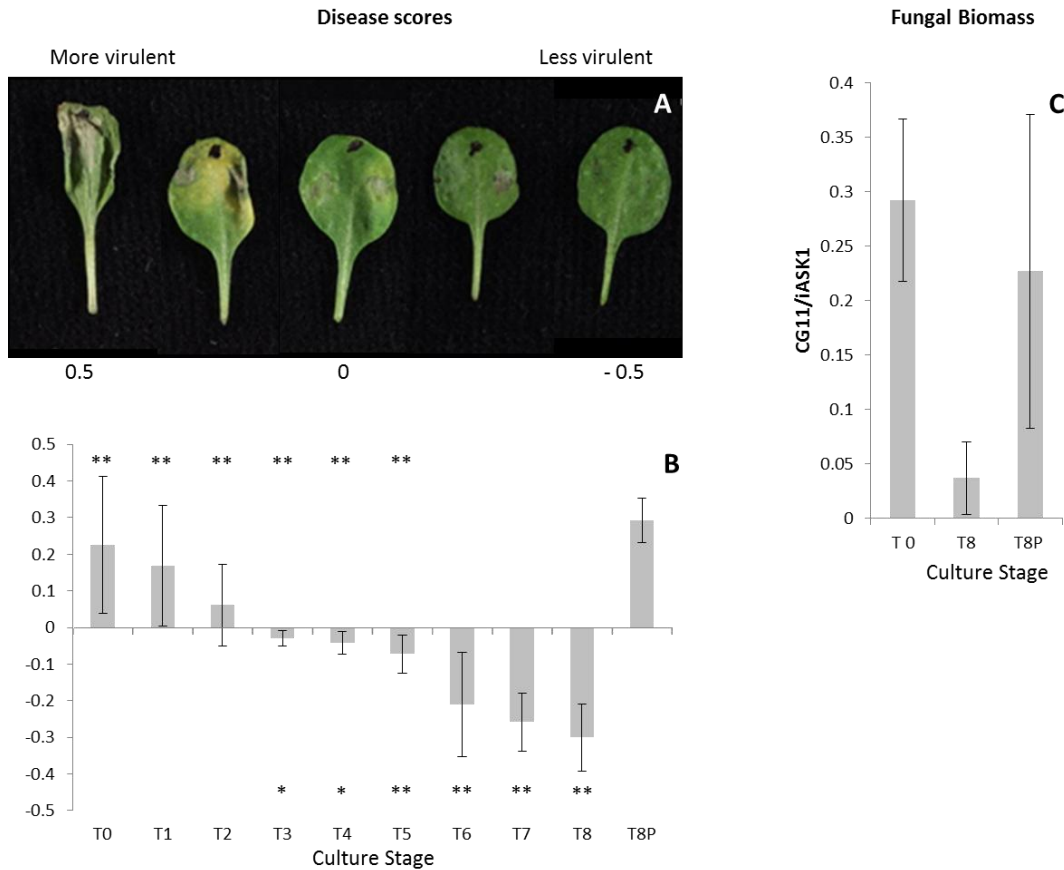

804

805

806 **Figure 1: Estimation of *Botrytis cinerea* virulence on *Arabidopsis thaliana*.** (a) Examples

807 of *A. thaliana* Col-0 leaves drop inoculated with *B. cinerea* and presenting disease scores

808 ranging from -0.5 (low virulence) to 0.5 (high virulence). (b) Estimated *B. cinerea* virulence

809 at each time culture point. Virulence of *B. cinerea* cultures was estimated over a period of

810 eight months in culture (T0, initial inoculum; T8, eight months in culture) and after 8 months

811 in culture and a single passage on *A. thaliana* (T8P). A weighted scoring method was used to

812 categorize *B. cinerea* lesion phenotypes 3 days post inoculation. Virulence symptoms (water-

813 soaking, chlorosis, and spreading necrosis) were conferred a range of positive scores and the

814 resistant symptoms (necrosis limited to inoculation site) were given negative scores. Asterisk  
815 symbols under the horizontal axis indicate significant differences (\* (T-Test;  $P < 0.05$ ) and \*\*  
816 (T-Test;  $P < 0.01$ )) between T0 and the time point over the asterisk. Asterisk symbols over the  
817 horizontal axis indicate significant differences (\*\* (T-Test;  $P < 0.01$ )) between T8P and the  
818 time point under the asterisk. (c) Detection of *in planta* *B. cinerea* hyphal mass in *A. thaliana*  
819 Col-0 by qPCR as described by Gachon and Saindrenan, 2004.

820

821

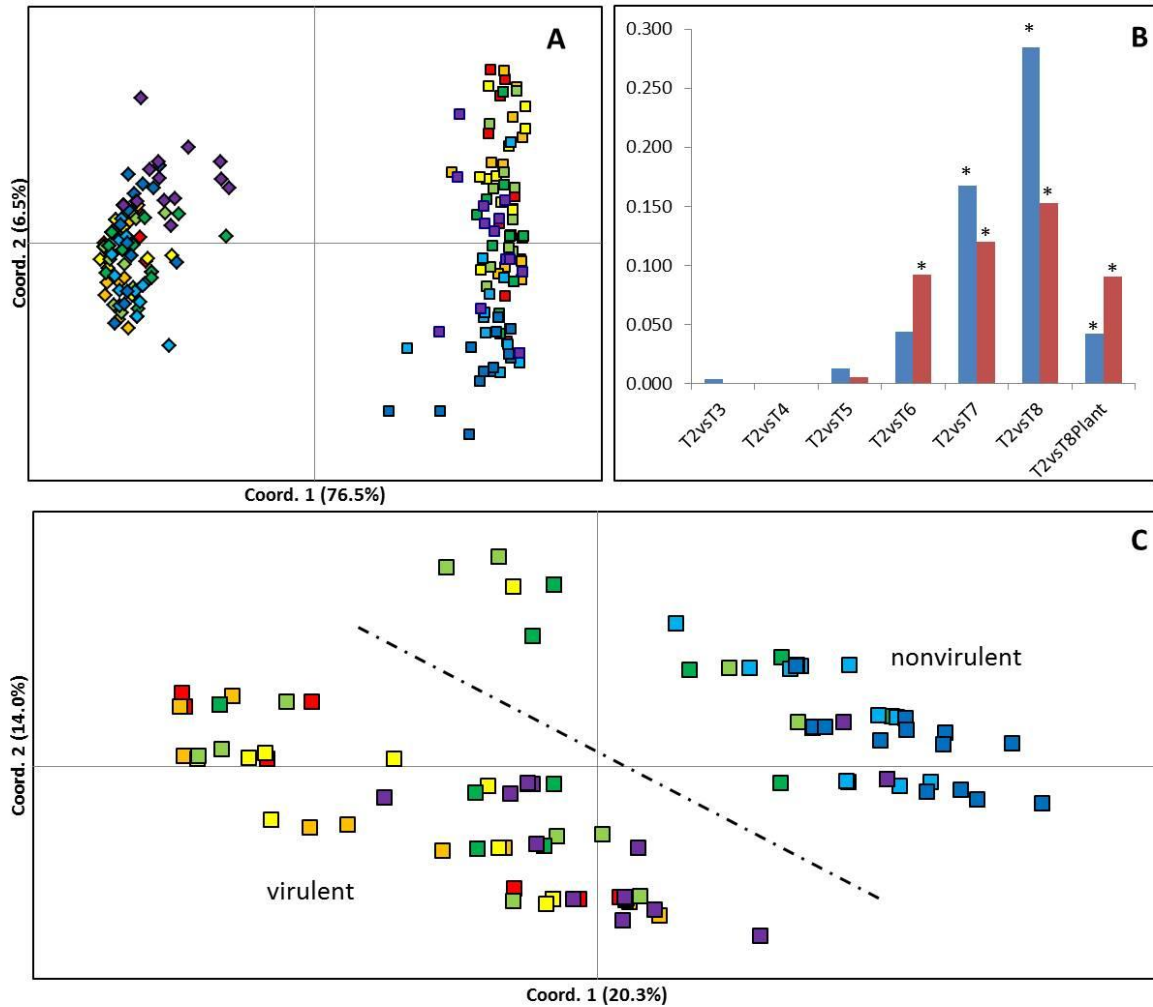

822

823 **Figure 2: Effect of time in culture on genetic/epigenetic instability. (a, c) Principal**

824 coordinate diagrams based on the Euclidian analysis of methylation-sensitive amplified

825 polymorphisms (MSAP) using enzymes *HpaII* (squares) and *MspI* (romboids) (a) and using

826 enzyme *HpaII* distances (c). 14 replicates from each time point are represented as red (T2: 2

827 months in culture), orange (T3: 3 months in culture), yellow (T4: 4 months in culture), light

828 green (T5: 5 months in culture), dark green (T6: 6 months in culture), light blue (T7: 7

829 months in culture), dark blue (T8: 8 months in culture), and purple (T8P: 8 months+plant).

830 The dashed line separates samples with higher average levels of virulence from those of

831 lower average levels of virulence. (b) Calculated Pairwise PhiPT (Michalakis & Excoffier,

832 1996) comparisons between samples restricted with *HpaII* (Blue) or *MspI* (Red) from each

833 time point and the samples after the second passage (2 months in culture). \* Indicates  
834 significantly different PhiPT values between T1 and the time point under the asterix based on  
835 10,000 permutations (Probability values > 0.05).

836

837

A

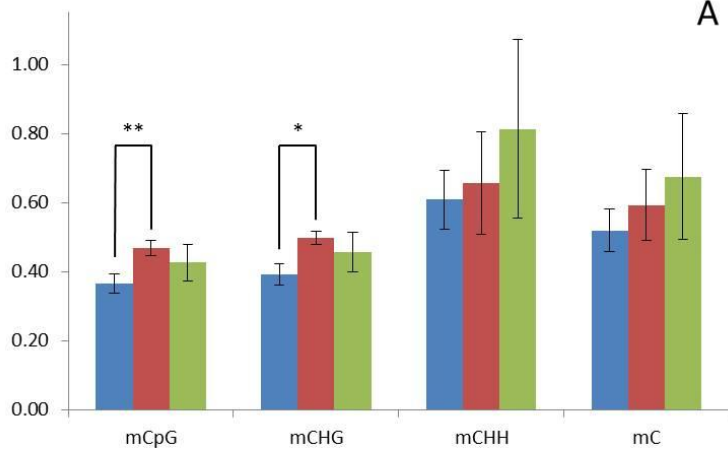

838

B

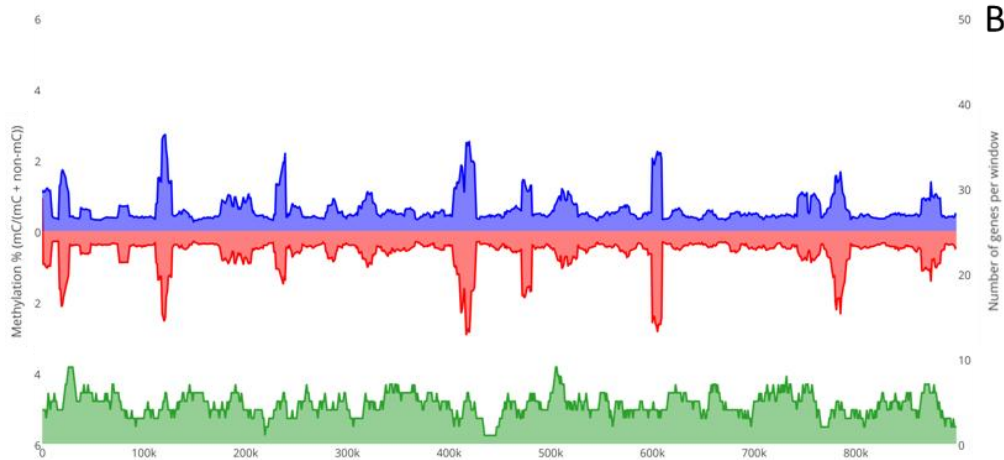

C

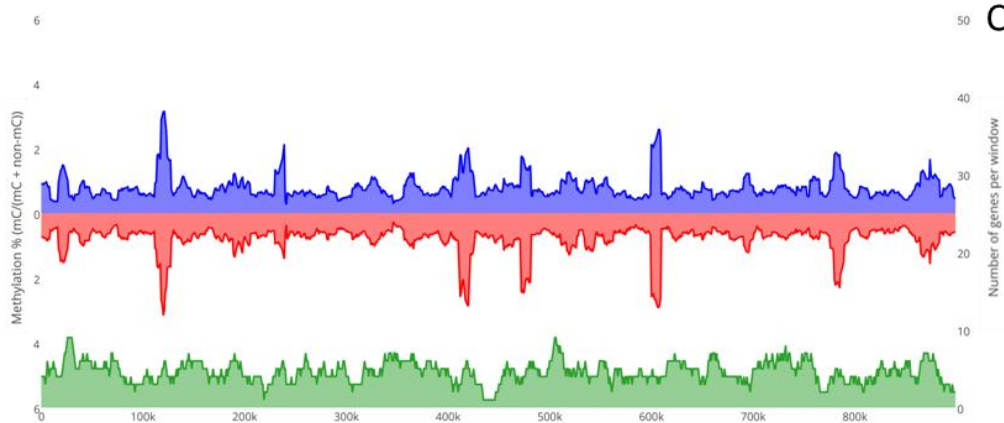

D

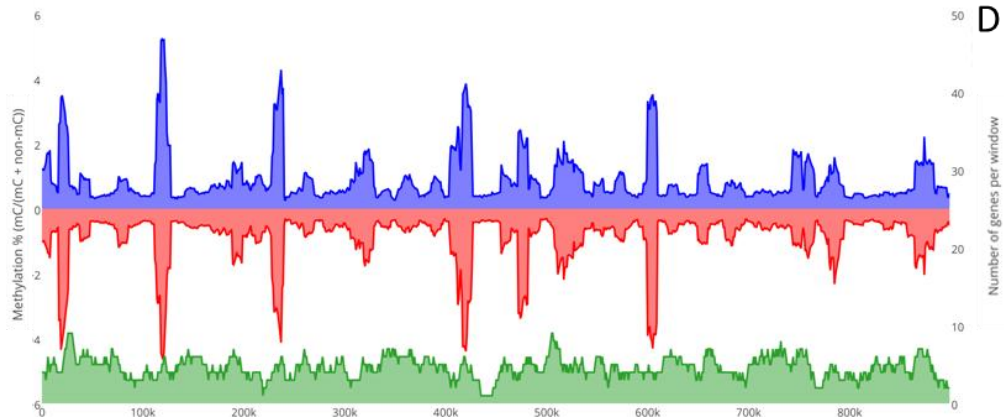

839

840 **Figure 3. Global changes on genomic distribution and levels of DNA methylation in B.**  
841 **cinerea.** **A)** Global average proportions of mCs (number of mCs/total Cs) at each time point  
842 (T1, Blue; T8, red and T8P, green). **B-D)** Methylcytosines (mCs) density from each strand  
843 (blue, positive and red, negative strand) across supercontig 1.1 at each time point (**B**=T0;  
844 **C**=T8 and **D**=T8P) was calculated and plotted as the proportion of methylated cytosines  
845 (mCs/total Cs) in each 10kb window.

846

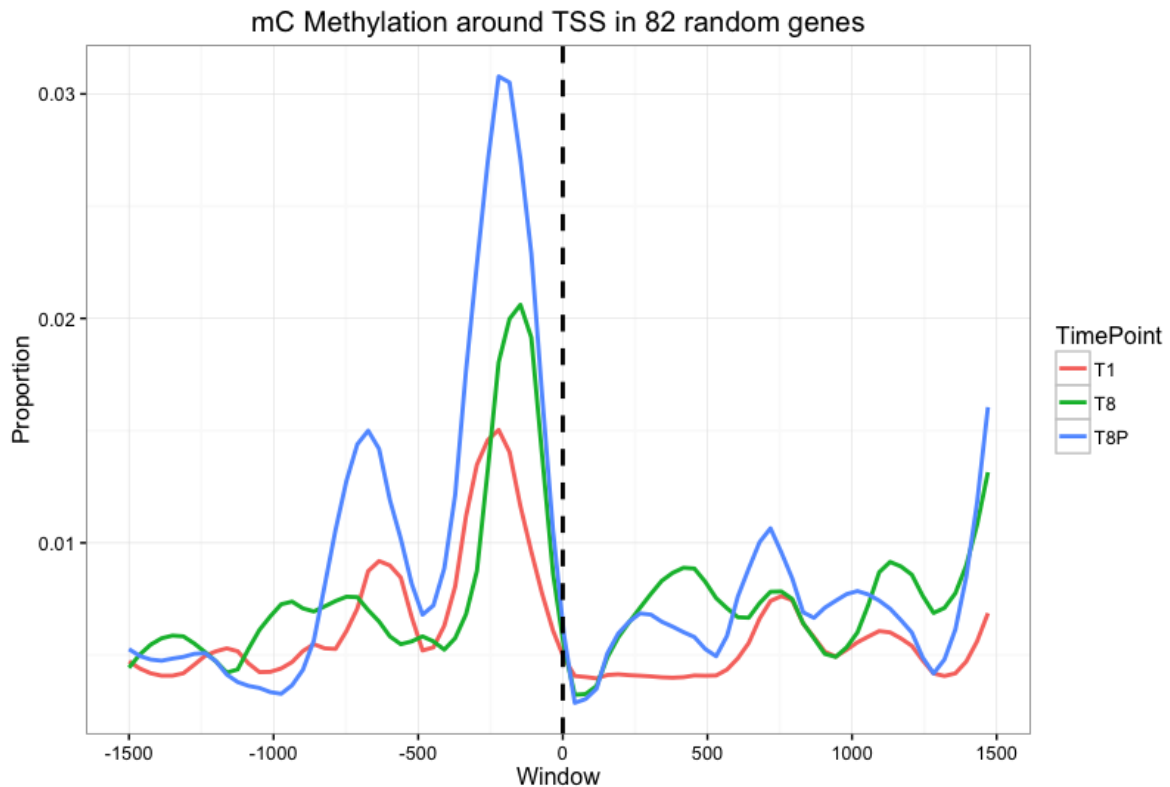

847

848

849 **Figure 4: Methylation density across transcription start sites (TSS) found in 82**

850 **randomly selected genes.** Methylation density was identified by the proportion of methyl

851 cytosine's against all cytosine's in 30bp windows 1.5kb before and after the transcription

852 start site.

853

854

855

856

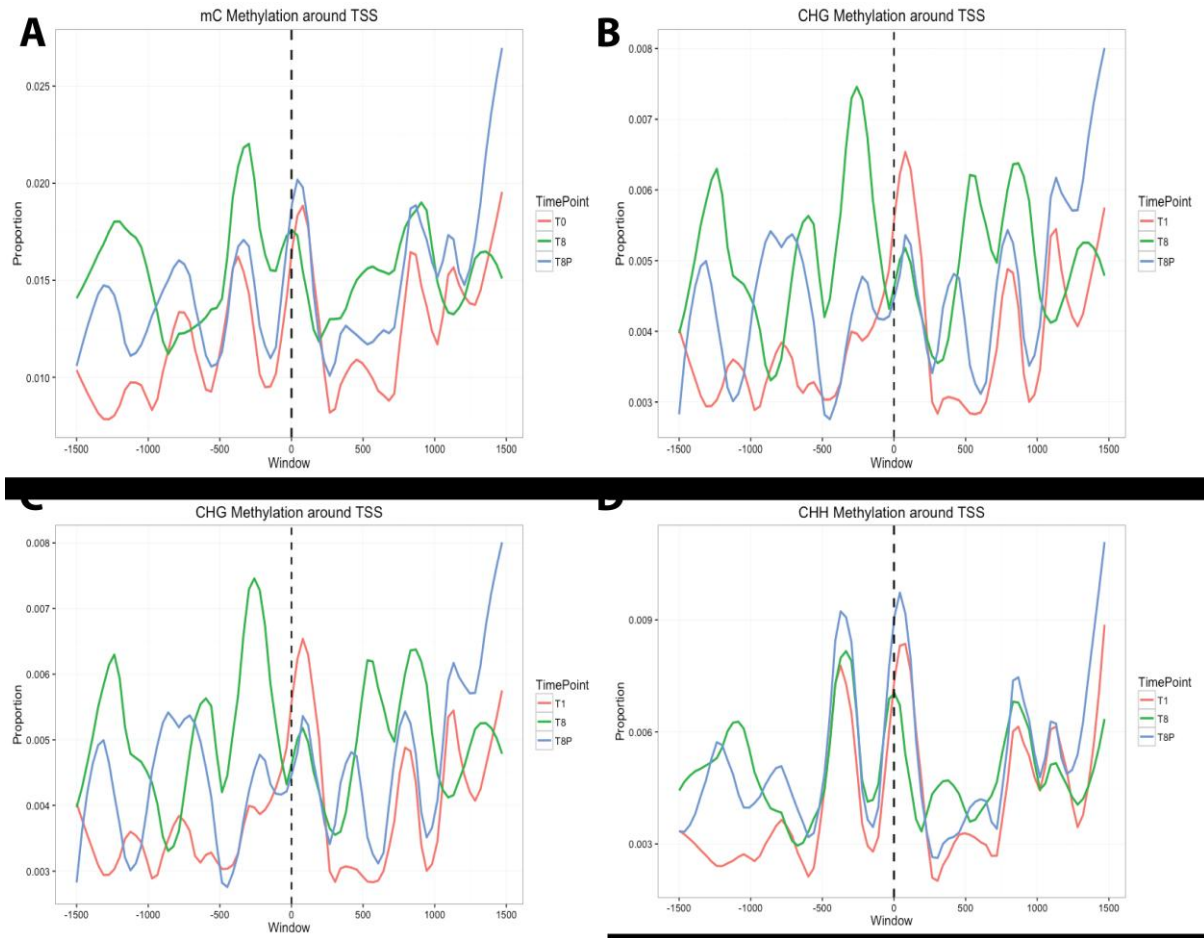

857

858 Figure 5: Methylation density across transcription start sites (TSS) found in 121 genes  
859 associated to polysaccharide degradation in *B. cinerea* (27) at each time point (T1, Blue; T8,  
860 red and T8P, green). Methylation level (Vertical axis) was identified by the proportion of  
861 methyl cytosine's against all cytosine's in 30bp windows 1.5kb before and after the  
862 transcription start site (TSS) (Horizontal axis). **A)** Methylation level for all mCs; **B)**  
863 Methylation level for CpG context; **C)** Methylation level for CpHpG context and **D)**  
864 Methylation level for CpHpH context.

865

866

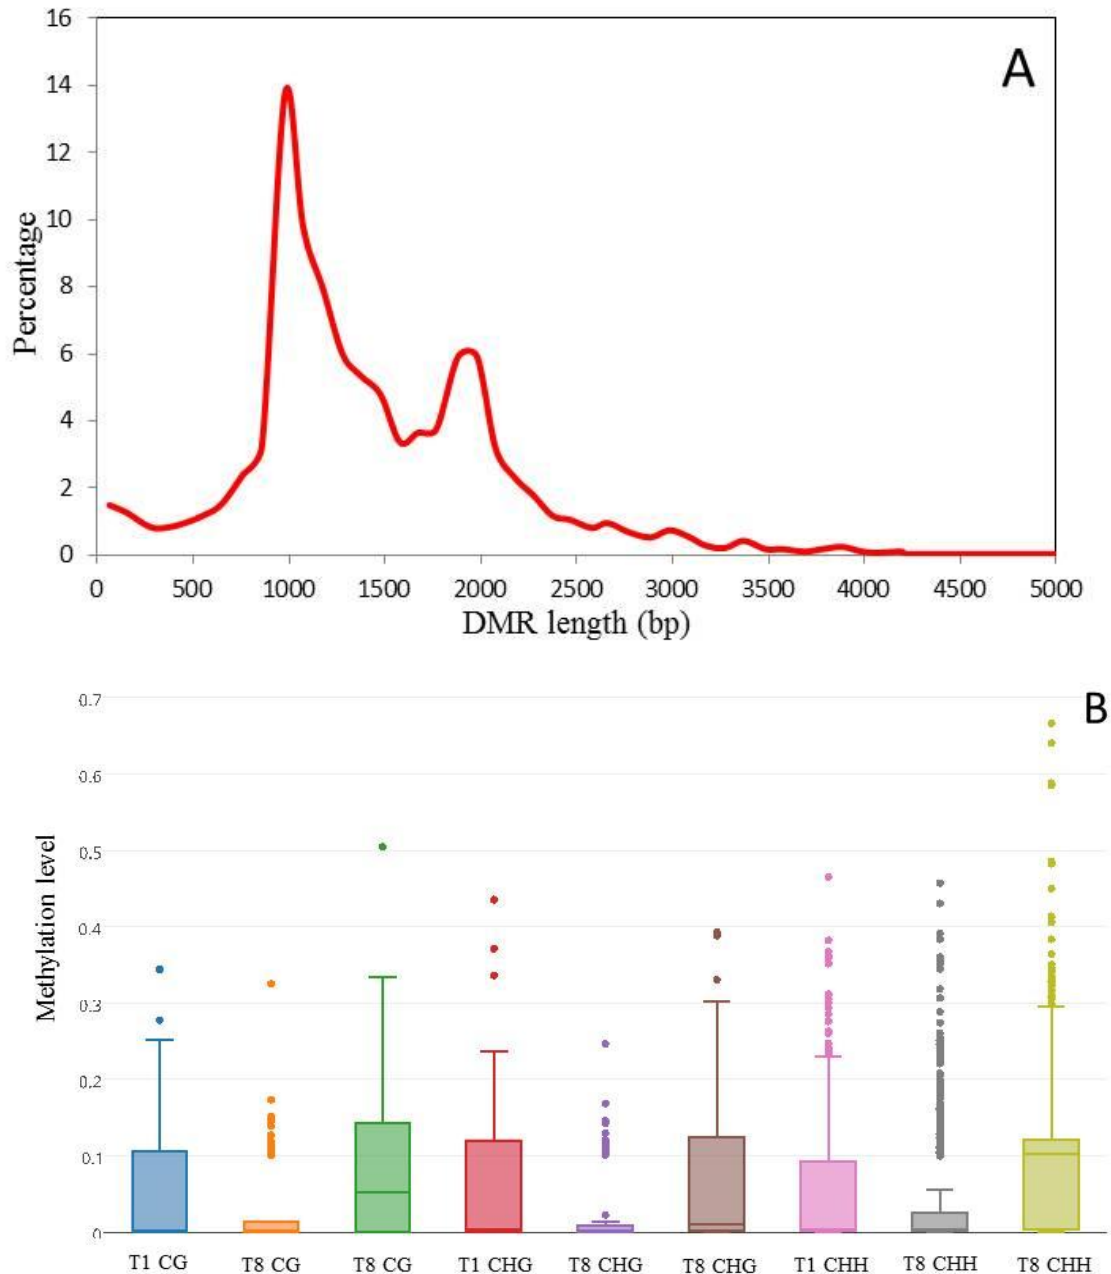

867

868

869 **Figure 6: Analysis of *in vitro* culture induced DMRs in *Botrytis cinerea*.** (a) Length  
870 distribution of *in vitro* culture induced DMRs in *Botrytis cinerea*. DRMs (i.e., regions  
871 presenting significantly different methylation levels between one sample and the other two  
872 samples (FDR<0.01)) were determined using a three sample Kruskal-Wallis test. Methylation  
873 levels were analysed by sliding window analysis using swDMR. DMRs were determined for  
874 all cytosines. (b) Methylation level distribution in *in vitro* induced DMRs. Boxplot of 3  
875 sample sliding window differential methylation analysis using swDMR. The boxplots shows



876 the distribution of each methylation in each context (CG, CHG and CHH) at three time points

877 (T1, T8 and T8P), circles indicate DMRs with outlier levels of methylation.

878

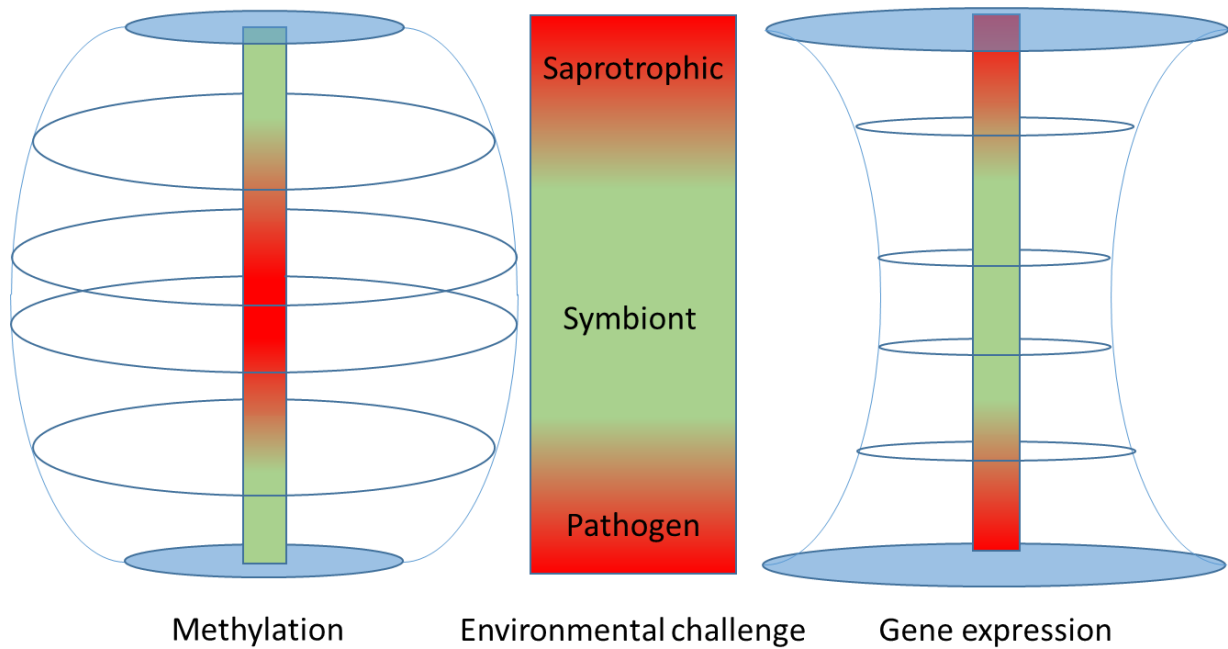

879

880 **Figure 7. Effect of level of environmental challenge on the number of expressed genes**

881 **and DNA methylation level on the fungal life style continuum:** DNA methylation follows

882 a barrel model with lichen fungi and *ectomycorrhizae* (confronted with stable environments

883 provided by their hosts) presenting higher global levels of DNA methylation compared to

884 their saprotrophic free living form (FLF). Conversely pathogenic fungi face a more

885 challenging environment when infecting a host than their free living forms. Since DNA

886 methylation is indicative of lower levels of gene expression the predicted number of gene

887 expresses should follow a ‘hourglass’ model with free living fungal species saprotrophic and

888 pathogenic, presenting a higher number of genes expressed to survive the more challenging

889 environments. Red shading indicates higher levels of DNA methylation, number of expressed

890 genes and environmental challenge. Green shading represent low levels of the same

891 parameters.

892

893

894

895 **Table 1: *Botrytis cinerea* virulence genes overlapping with *in vitro* culture induced**

896 **DMRs.** Column DRM overlap/context/pattern indicates what region of the gene overlaps

897 with the DRM (P= promoter; G= Gene body; 3' after downstream of the 3'UTR) in what

898 Cytosine context the DMR is observed (mC= all Cytosines; CG, CHG and CHH ) what DNA

899 methylation behaviour the DMR showed when comparing all three samples (2, T1=T8P >

900 T8; 1a, T1>T8=T8P; 1b, T1=T8<T8P and 0, T1=T8P < T8). (1,2)(1,2)(26,27)(1,2)(1,2)

901

| Gene Function                     | Total                 | Gene/DMR Overlap |            |            |             | DMR Type   |            |           |            | Reference |      |
|-----------------------------------|-----------------------|------------------|------------|------------|-------------|------------|------------|-----------|------------|-----------|------|
|                                   |                       | #G/D             | %G/D       | #G/D       | %G/D        | recovery   |            | Non-recov |            |           |      |
|                                   |                       |                  |            |            |             | 0          | 2          | 1a        | 1b         |           |      |
| Housekeeping                      | 5                     | -                | -          | -          | -           | -          | -          | -         | -          | (26)      |      |
| Apoptosis                         | 10                    | 2                | 20         | 4          | 40.0        | 3          | 1          | -         | -          | (26)      |      |
| Conidiation                       | 16                    | -                | -          | 6          | 37.5        | 1          | 2          | -         | 3          | (26)      |      |
| Mating and fruit body development | 32                    | 6                | 18.8       | 6          | 18.7        | 1          | 4          | 1         | 1          | (26)      |      |
| Secondary metabolism              | 51                    | 4                | 7.8        | 14         | 27.5        | 9          | 3          | 2         | 3          | (26)      |      |
| Signalling pathways               | 176                   | 6                | 3.4        | 54         | 30.7        | 12         | 17         | 7         | 20         | (26)      |      |
| Sclerotium formation              | 249                   | 7                | 2.8        | 67         | 26.9        | 26         | 31         | 10        | 13         | (26)      |      |
| Virul. <i>s.l.</i>                | Appressorium          | 12               | 2          | 16.7       | 3           | 25.0       | 1          | -         | -          | 3         | (26) |
|                                   | Virulence <i>s.s.</i> | 17               | 1          | 5.9        | 4           | 23.5       | 1          | 1         | 1          | 2         | (27) |
|                                   | CAZyme genes          | 1155             | 50         | 4.3        | 320         | 27.7       | 112        | 132       | 45         | 99        | (28) |
| <b>Total</b>                      | <b>1577</b>           | <b>68</b>        | <b>4.3</b> | <b>478</b> | <b>30.3</b> | <b>166</b> | <b>191</b> | <b>66</b> | <b>144</b> |           |      |

902

903

904 Table 2: Coverage statistics for bisulfite samples

905

| Sample | Mean Coverage | Std dev | Cytosine coverage | Cytosine coverage (>4x) | mC (>1x) |
|--------|---------------|---------|-------------------|-------------------------|----------|
| T1     | 54.9939       | 20.3428 | 92.55%            | 87.65%                  | 10.99%   |
| T8     | 33.1991       | 13.868  | 91.50%            | 81.07%                  | 9.14%    |
| T8P    | 45.0209       | 17.0144 | 93.42%            | 86.67%                  | 10.63%   |

906

907

908  
909  
910  
911  
912  
913  
914  
915  
916  
917  
918

**Table 2: Number of Differentially Methylated Regions (DMRs) between T1, T8 and T8P samples.** DRMs (i.e., regions presenting significantly different methylation levels between one sample and the other two samples (FDR<0.01)) were determined using a three sample Kruskal-Wallis test. Methylation levels were analysed by sliding window analysis using swDMR. DMRs were determined for all cytosines and for three methylation contexts. DMRs were grouped according to their changing patterns into recovery (T1=T8P) and non-recovery (T1<> T8P). Two subgroups were found for recovery (T1=T8P < T8 (Type 0) and T1=T8P > T8 (Type 2)) and non-recovery (T1>T8=T8P (Type 1a) and T1=T8<T8P (Type 1b)). Percentage of the total DMRs for each pattern type/sequence context is shown in parenthesis.

|       | Total | Recovery (%) |              | Total recovery (%) | No recovery                |                         |
|-------|-------|--------------|--------------|--------------------|----------------------------|-------------------------|
|       |       | Type 0       | Type 2       |                    | In vitro induced (Type 1a) | Plant induced (Type 1b) |
| mC    | 2822  | 757 (26.82)  | 860 (30.47)  | 1617 (57.30)       | 452 (16.02)                | 753 (26.68)             |
| CG    | 70    | 17 (24.29)   | 15 (21.43)   | 32 (45.71)         | 14 (20.00)                 | 24 (34.29)              |
| CHG   | 82    | 14 (17.07)   | 30 (36.59)   | 44 (53.66)         | 15 (18.29)                 | 23 (28.05)              |
| CHH   | 1248  | 303 (24.28)  | 490 (39.26)  | 793 (63.54)        | 137 (10.98))               | 318 (25.48)             |
| Total | 4222  | 1395 (33.04) | 1091 (25.84) | 2486(58.88)        | 618 (14.64)                | 1118 (26.48)            |

919  
920

921 **Table 3: *Botrytis cinerea* in vitro induced Differentially Methylated Regions overlapping**  
 922 **with genes.** DRMs overlapping with genes (i.e., regions presenting significantly different  
 923 methylation levels between one sample and the other two samples (FDR<0.01)) were  
 924 determined using a three sample Kruskal-Wallis test. Methylation levels were analyzed by  
 925 sliding window analysis using swDMR. DMRs were determined for all cytosines and for  
 926 three methylation contexts. DMRs were grouped according to the genic region they  
 927 overlapped with (i.e, Promoter, promoter and Gene body, promoter, Gene body and 3'UTR,  
 928 gene body and 3'UTR and gene body). (\*\*) Percentage of the total DMRs overlapping with  
 929 each particular genic region. (\*) Percentage of the total number of genes showing a  
 930 methylation recovery pattern.

931

|     | Total genes            | Promoter,<br>Gene body<br>and 3'UTR<br>(*) | Promoter<br>only (*) | Promoter<br>and Gene<br>body (*) | Gene body<br>and 3'UTR<br>(*) | Gene body<br>(*) |
|-----|------------------------|--------------------------------------------|----------------------|----------------------------------|-------------------------------|------------------|
| mC  | 3055                   | 626 (20.49)                                | 61 (2.00)            | 1022 (33.45)                     | 923 (30.21)                   | 423 (13.85)      |
| CG  | 68                     | 3 (4.41)                                   | 0 (0.00)             | 24 (35.29)                       | 21 (30.88)                    | 20 (29.41)       |
| CHG | 84                     | 8 (9.52)                                   | 0 (0.00)             | 29 (34.52)                       | 27 (32.14)                    | 20 (23.81)       |
| CHH | 1339                   | 248 (18.52)                                | 32 (2.39)            | 443 (33.08)                      | 413 (30.84)                   | 203 (15.16)      |
|     | Recovery<br>genes (**) |                                            |                      |                                  |                               |                  |
| mC  | 1713 (56.07)           | 345 (20.14)                                | 43 (2.51)            | 545 (31.82)                      | 537 (31.35)                   | 243 (14.19)      |
| CG  | 32 (47.06)             | 2 (6.25)                                   | 0 (0.00)             | 11 (34.38)                       | 9 (28.13)                     | 10 (31.25)       |
| CHG | 46 (54.76)             | 4 (8.70)                                   | 1 (2.17)             | 13 (28.26)                       | 16 (34.78)                    | 12 (26.09)       |
| CHH | 863 (64.45)            | 175 (20.28)                                | 21 (2.43)            | 286 (33.14)                      | 252 (29.20)                   | 129 (14.95)      |

932

933

934

935

936 Supplementary Tables

937

938 Supplementary Table 2: Genome mapping statistics from 9 bisulfite converted Botrytis  
 939 samples. All samples were mapped to *B. cinera* B05.10 genome using Bismark/Bowtie2

940

| Samples | Total bp    | % Map. Effic | Total methylated C's |           |            | Total non-methylated C's |              |              | % methylation |      |      | % mC |
|---------|-------------|--------------|----------------------|-----------|------------|--------------------------|--------------|--------------|---------------|------|------|------|
|         |             |              | CpG                  | CHG       | CHH        | CpG                      | CHG          | CHH          | CpG           | CHG  | CHH  |      |
| T1BS1   | 26382612    | 67.6         | 477254               | 438983    | 2499975    | 130600424                | 111869938    | 391807290    | 0.36          | 0.39 | 0.63 | 0.54 |
| T1BS2   | 34048060    | 62.9         | 526341               | 485477    | 2494454    | 155155501                | 134341879    | 485255169    | 0.34          | 0.36 | 0.51 | 0.45 |
| T1BS3   | 17347608    | 61.1         | 306505               | 279816    | 1575956    | 77226256                 | 66054702     | 232502707    | 0.40          | 0.42 | 0.67 | 0.57 |
| AvT1    | 25926093.33 | 63.87        | 436700.00            | 401425.33 | 2190128.33 | 120994060.33             | 104088839.67 | 369855055.33 | 0.36          | 0.38 | 0.59 | 0.52 |
| T8BS1   | 18543427    | 62           | 394348               | 360641    | 1568745    | 83351098                 | 71894819     | 257263175    | 0.47          | 0.50 | 0.61 | 0.56 |
| T8BS2   | 12613134    | 60.7         | 248968               | 229853    | 902624     | 55786373                 | 47759672     | 166229028    | 0.44          | 0.48 | 0.54 | 0.51 |
| T8BS3   | 17117307    | 65.1         | 391446               | 360065    | 2142019    | 79537475                 | 69135859     | 257486354    | 0.49          | 0.52 | 0.83 | 0.71 |
| AvT8    | 16091289.33 | 62.60        | 344920.67            | 316853.00 | 1537796.00 | 72891648.67              | 62930116.67  | 226992852.33 | 0.47          | 0.50 | 0.67 | 0.59 |
| T8PBS1  | 28336888    | 62.3         | 524875               | 487874    | 3561078    | 126943754                | 110309124    | 404488048    | 0.41          | 0.44 | 0.87 | 0.71 |
| T8PBS2  | 18471780    | 66.9         | 435528               | 403984    | 2932991    | 89352607                 | 77332840     | 279892313    | 0.49          | 0.52 | 1.04 | 0.84 |
| T8PBS3  | 14694194    | 54.3         | 220458               | 201667    | 924438     | 57483914                 | 49293008     | 173794940    | 0.38          | 0.41 | 0.53 | 0.48 |
| AvT8P   | 20500954.00 | 61.17        | 393620.33            | 364508.33 | 2472835.67 | 91260091.67              | 78978324.00  | 286058433.67 | 0.43          | 0.46 | 0.86 | 0.68 |

941

942

943

944

945

946

947

948 **Supplementary Table 7: Primer sequences used for MSAP.**

| <b>Oligo name</b>      | <b>Function</b>     | <b>Sequence</b>     |
|------------------------|---------------------|---------------------|
| <i>Ad HpaII/MspI</i>   | Reverse Adaptor     | GACGATGAGTCTAGAA    |
| <i>Ad. HpaII/MspI</i>  | Forward Adaptor     | CGTTCT AGACTCATC    |
| <i>Ad. EcoRI</i>       | Reverse Adaptor     | AATTGGTACGCAGTCTAC  |
| <i>Ad EcoRI</i>        | Forward Adaptor     | CTCGTAGACTGCGTACC   |
| <i>Pre. EcoRI</i>      | Preselective primer | GACTGCGTACCAATTCA   |
| <i>Pre. HpaII/MspI</i> | Preselective primer | GATGAGTCCTGAGCGGC   |
| <i>EcoRI2</i>          | Selective primer    | GACTGCGTACCAATTCAAC |
| <i>HpaII 2.1</i>       | Selective primer    | GATGAGTCCTGAGCGGCA  |

949  
950  
951  
952



953  
954  
955  
956  
957  
958

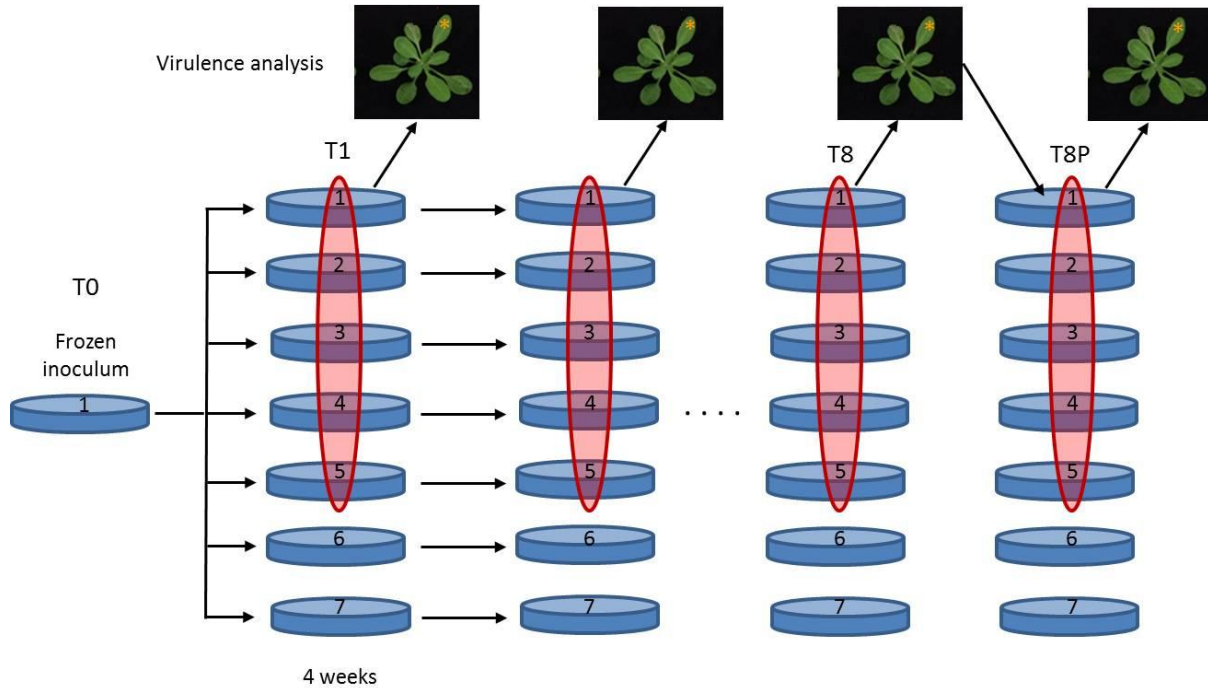

959

960 **Figure S1: Schematic representation of experimental design.** Seven replicated *Botrytis*  
961 *cinerea* cultures were initiated from a single frozen inoculum and cultured for 36 weeks. All  
962 replicates were subcultured every 4 weeks to fresh culture medium and mycelia were kept for  
963 DNA analysis (MSAPs, WGS, and BS-WGS). Conidia from five randomly selected  
964 replicates (highlighted in red) at each time point were collected and used for virulence  
965 analysis by inoculating five *Arabidopsis thaliana*. Inoculated *A. thaliana* leaves\* at T1, T8  
966 and T8P were collected 72 hours after inoculation for estimation of *in planta* fungal  
967 development by quantitative PCR. Conidia from were collected from *A. thaliana* tissue  
968 infected with T8 fungus and were re-cultured for a short time to generate conidia to test  
969 virulence recovery.

970

971

972

973

974

975

976
